# Supplementary material
Source: MDPI journal article supplement (https://www.mdpi.com/2071-1050/7/9/12372)
Supplement: s1 [file s1]

# Using Multiple Tools to Analyze Resource Exchange in China. *Sustainability* 2015, 7, 12372-12385

Nan Li <sup>1</sup>, Tianzhu Zhang <sup>2,\*</sup>, Jianchuan Qi <sup>3</sup> and Yuanyi Huang <sup>4</sup>

<sup>1</sup> School of Information Management, Beijing Information Science & Technology University, Beijing 100192, China; E-Mail: linan@bistu.edu.cn

<sup>2</sup> School of Environment, State Key Joint Laboratory of Environment Simulation and Pollution Control, Tsinghua University, Beijing 100084, China

<sup>3</sup> College of Architecture and Environment, Sichuan University, Chengdu 610065, China; E-Mail: qjc@stu.scu.edu.cn

<sup>4</sup> Civil and Environmental Engineering School, University of Science and Technology Beijing, Beijing 100083, China; E-Mail: b20140065@xs.ustb.edu.cn

\* Author to whom correspondence should be addressed; E-Mail: zhangtz@tsinghua.edu.cn; Tel.: +86-10-6278-5610.

**Table S1.** Commodity allocation of SITC and material production sectors.

| SITC  | Sector ID | MIOT Sector Name                                                     |
|-------|-----------|----------------------------------------------------------------------|
| 41    | 1         | Crop cultivation, forestry livestock, livestock products and fishery |
| 42    | 1         | Crop cultivation, forestry livestock, livestock products and fishery |
| 43    | 1         | Crop cultivation, forestry livestock, livestock products and fishery |
| 44    | 1         | Crop cultivation, forestry livestock, livestock products and fishery |
| 45    | 1         | Crop cultivation, forestry livestock, livestock products and fishery |
| 46    | 1         | Crop cultivation, forestry livestock, livestock products and fishery |
| 47    | 1         | Crop cultivation, forestry livestock, livestock products and fishery |
| 48    | 1         | Crop cultivation, forestry livestock, livestock products and fishery |
| 54.1  | 1         | Crop cultivation, forestry livestock, livestock products and fishery |
| 56.41 | 1         | Crop cultivation, forestry livestock, livestock products and fishery |
| 56.42 | 1         | Crop cultivation, forestry livestock, livestock products and fishery |
| 56.45 | 1         | Crop cultivation, forestry livestock, livestock products and fishery |
| 56.47 | 1         | Crop cultivation, forestry livestock, livestock products and fishery |
| 56.61 | 1         | Crop cultivation, forestry livestock, livestock products and fishery |
| 61.1  | 1         | Crop cultivation, forestry livestock, livestock products and fishery |
| 61.2  | 1         | Crop cultivation, forestry livestock, livestock products and fishery |
| 61.5  | 1         | Crop cultivation, forestry livestock, livestock products and fishery |
| 54.2  | 1         | Crop cultivation, forestry livestock, livestock products and fishery |
| 56.46 | 1         | Crop cultivation, forestry livestock, livestock products and fishery |
| 57.7  | 1         | Crop cultivation, forestry livestock, livestock products and fishery |
| 58.92 | 1         | Crop cultivation, forestry livestock, livestock products and fishery |

Table S1. *Cont.*

| SITC   | Sector ID | MIOT Sector Name                                                                             |
|--------|-----------|----------------------------------------------------------------------------------------------|
| 222    | 1         | Crop cultivation, forestry livestock, livestock products and fishery                         |
| 223    | 1         | Crop cultivation, forestry livestock, livestock products and fishery                         |
| 54.4   | 1         | Crop cultivation, forestry livestock, livestock products and fishery                         |
| 54.5   | 1         | Crop cultivation, forestry livestock, livestock products and fishery                         |
| 54.6   | 1         | Crop cultivation, forestry livestock, livestock products and fishery                         |
| 54.7   | 1         | Crop cultivation, forestry livestock, livestock products and fishery                         |
| 54.8   | 1         | Crop cultivation, forestry livestock, livestock products and fishery                         |
| 56.1   | 1         | Crop cultivation, forestry livestock, livestock products and fishery                         |
| 56.69  | 1         | Crop cultivation, forestry livestock, livestock products and fishery                         |
| 56.7   | 1         | Crop cultivation, forestry livestock, livestock products and fishery                         |
| 56.48  | 1         | Crop cultivation, forestry livestock, livestock products and fishery                         |
| 57     | 1         | Crop cultivation, forestry livestock, livestock products and fishery                         |
| 58     | 1         | Crop cultivation, forestry livestock, livestock products and fishery                         |
| 59     | 1         | Crop cultivation, forestry livestock, livestock products and fishery                         |
| 263    | 1         | Crop cultivation, forestry livestock, livestock products and fishery                         |
| 264    | 1         | Crop cultivation, forestry livestock, livestock products and fishery                         |
| 265    | 1         | Crop cultivation, forestry livestock, livestock products and fishery                         |
| 71     | 6         | Food and tobacco products                                                                    |
| 72     | 6         | Food and tobacco products                                                                    |
| 73     | 6         | Food and tobacco products                                                                    |
| 74     | 6         | Food and tobacco products                                                                    |
| 75     | 6         | Food and tobacco products                                                                    |
| 121    | 6         | Food and tobacco products                                                                    |
| 122    | 6         | Food and tobacco products                                                                    |
| 81.11  | 1         | Crop cultivation, forestry livestock, livestock products and fishery                         |
| 81.12  | 1         | Crop cultivation, forestry livestock, livestock products and fishery                         |
| 81.13  | 1         | Crop cultivation, forestry livestock, livestock products and fishery                         |
| 246    | 9         | Sawmills, fibreboard, furniture and products of wood, bamboo, cane, palm, straw, <i>etc.</i> |
| 247    | 9         | Sawmills, fibreboard, furniture and products of wood, bamboo, cane, palm, straw, <i>etc.</i> |
| 248    | 9         | Sawmills, fibreboard, furniture and products of wood, bamboo, cane, palm, straw, <i>etc.</i> |
| 634    | 9         | Sawmills, fibreboard, furniture and products of wood, bamboo, cane, palm, straw, <i>etc.</i> |
| 635    | 9         | Sawmills, fibreboard, furniture and products of wood, bamboo, cane, palm, straw, <i>etc.</i> |
| 245    | 9         | Sawmills, fibreboard, furniture and products of wood, bamboo, cane, palm, straw, <i>etc.</i> |
| 633    | 9         | Sawmills, fibreboard, furniture and products of wood, bamboo, cane, palm, straw, <i>etc.</i> |
| 231    | 1         | Crop cultivation, forestry livestock, livestock products and fishery                         |
| 244    | 9         | Sawmills, fibreboard, furniture and products of wood, bamboo, cane, palm, straw, <i>etc.</i> |
| 34     | 1         | Crop cultivation, forestry livestock, livestock products and fishery                         |
| 35     | 1         | Crop cultivation, forestry livestock, livestock products and fishery                         |
| 37.1   | 1         | Crop cultivation, forestry livestock, livestock products and fishery                         |
| 36     | 1         | Crop cultivation, forestry livestock, livestock products and fishery                         |
| 37.2   | 1         | Crop cultivation, forestry livestock, livestock products and fishery                         |
| 292.97 | 1         | Crop cultivation, forestry livestock, livestock products and fishery                         |
| 1      | 1         | Crop cultivation, forestry livestock, livestock products and fishery                         |
| 11     | 1         | Crop cultivation, forestry livestock, livestock products and fishery                         |

Table S1. *Cont.*

| SITC  | Sector ID | MIOT Sector Name                                                                    |
|-------|-----------|-------------------------------------------------------------------------------------|
| 12    | 1         | Crop cultivation, forestry livestock, livestock products and fishery                |
| 16    | 1         | Crop cultivation, forestry livestock, livestock products and fishery                |
| 17    | 1         | Crop cultivation, forestry livestock, livestock products and fishery                |
| 22    | 1         | Crop cultivation, forestry livestock, livestock products and fishery                |
| 23    | 1         | Crop cultivation, forestry livestock, livestock products and fishery                |
| 24    | 1         | Crop cultivation, forestry livestock, livestock products and fishery                |
| 25    | 1         | Crop cultivation, forestry livestock, livestock products and fishery                |
| 61.6  | 1         | Crop cultivation, forestry livestock, livestock products and fishery                |
| 261   | 1         | Crop cultivation, forestry livestock, livestock products and fishery                |
| 268   | 1         | Crop cultivation, forestry livestock, livestock products and fishery                |
| 291   | 1         | Crop cultivation, forestry livestock, livestock products and fishery                |
| 211   | 1         | Crop cultivation, forestry livestock, livestock products and fishery                |
| 212   | 1         | Crop cultivation, forestry livestock, livestock products and fishery                |
| 411   | 8         | Wearing apparel, leather, furs, down and related products                           |
| 431   | 8         | Wearing apparel, leather, furs, down and related products                           |
| 611   | 8         | Wearing apparel, leather, furs, down and related products                           |
| 612   | 8         | Wearing apparel, leather, furs, down and related products                           |
| 613   | 8         | Wearing apparel, leather, furs, down and related products                           |
| 81.19 | 6         | Food and tobacco products                                                           |
| 81.2  | 6         | Food and tobacco products                                                           |
| 81.3  | 6         | Food and tobacco products                                                           |
| 81.4  | 6         | Food and tobacco products                                                           |
| 81.5  | 6         | Food and tobacco products                                                           |
| 81.9  | 6         | Food and tobacco products                                                           |
| 61.9  | 6         | Food and tobacco products                                                           |
| 62    | 6         | Food and tobacco products                                                           |
| 91    | 6         | Food and tobacco products                                                           |
| 98    | 6         | Food and tobacco products                                                           |
| 111   | 6         | Food and tobacco products                                                           |
| 112   | 6         | Food and tobacco products                                                           |
| 251   | 10        | Paper, printing, record medium reproduction, cultural goods and recreation products |
| 272.1 | 6         | Food and tobacco products                                                           |
| 292   | 6         | Food and tobacco products                                                           |
| 421   | 6         | Food and tobacco products                                                           |
| 422   | 6         | Food and tobacco products                                                           |
| 641   | 10        | Paper, printing, record medium reproduction, cultural goods and recreation products |
| 642   | 10        | Paper, printing, record medium reproduction, cultural goods and recreation products |
| 274.2 | 4         | Metal ore mining                                                                    |
| 281   | 4         | Metal ore mining                                                                    |
| 282   | 14        | Metal smelting and processing                                                       |
| 671   | 14        | Metal smelting and processing                                                       |
| 672   | 14        | Metal smelting and processing                                                       |
| 673   | 14        | Metal smelting and processing                                                       |
| 674   | 14        | Metal smelting and processing                                                       |
| 675   | 14        | Metal smelting and processing                                                       |

Table S1. *Cont.*

| SITC   | Sector ID | MIOT Sector Name              |
|--------|-----------|-------------------------------|
| 676    | 14        | Metal smelting and processing |
| 677    | 14        | Metal smelting and processing |
| 678    | 14        | Metal smelting and processing |
| 679    | 14        | Metal smelting and processing |
| 693.11 | 14        | Metal smelting and processing |
| 693.2  | 14        | Metal smelting and processing |
| 693.5  | 14        | Metal smelting and processing |
| 283    | 4         | Metal ore mining              |
| 288.21 | 14        | Metal smelting and processing |
| 682    | 14        | Metal smelting and processing |
| 693.12 | 14        | Metal smelting and processing |
| 284    | 4         | Metal ore mining              |
| 288.22 | 14        | Metal smelting and processing |
| 683    | 14        | Metal smelting and processing |
| 287.4  | 4         | Metal ore mining              |
| 288.24 | 14        | Metal smelting and processing |
| 685    | 14        | Metal smelting and processing |
| 287.5  | 4         | Metal ore mining              |
| 288.25 | 14        | Metal smelting and processing |
| 686    | 14        | Metal smelting and processing |
| 287.6  | 4         | Metal ore mining              |
| 288.26 | 4         | Metal ore mining              |
| 687    | 14        | Metal smelting and processing |
| 289    | 4         | Metal ore mining              |
| 681    | 4         | Metal ore mining              |
| 285    | 4         | Metal ore mining              |
| 288.23 | 4         | Metal ore mining              |
| 684    | 14        | Metal smelting and processing |
| 693.13 | 14        | Metal smelting and processing |
| 286    | 4         | Metal ore mining              |
| 525    | 4         | Metal ore mining              |
| 287.7  | 4         | Metal ore mining              |
| 287.8  | 4         | Metal ore mining              |
| 287.9  | 4         | Metal ore mining              |
| 288.1  | 4         | Metal ore mining              |
| 689    | 14        | Metal smelting and processing |
| 691    | 15        | Metal products                |
| 692    | 15        | Metal products                |
| 694    | 15        | Metal products                |
| 695    | 15        | Metal products                |
| 696    | 15        | Metal products                |
| 697    | 15        | Metal products                |
| 699    | 15        | Metal products                |
| 711    | 15        | Metal products                |
| 712    | 15        | Metal products                |

Table S1. *Cont.*

| SITC | Sector ID | MIOT Sector Name                                       |
|------|-----------|--------------------------------------------------------|
| 713  | 15        | Metal products                                         |
| 714  | 15        | Metal products                                         |
| 716  | 15        | Metal products                                         |
| 718  | 15        | Metal products                                         |
| 721  | 16        | General and special industrial machinery               |
| 722  | 16        | General and special industrial machinery               |
| 723  | 16        | General and special industrial machinery               |
| 724  | 16        | General and special industrial machinery               |
| 725  | 16        | General and special industrial machinery               |
| 726  | 16        | General and special industrial machinery               |
| 727  | 16        | General and special industrial machinery               |
| 728  | 16        | General and special industrial machinery               |
| 731  | 16        | General and special industrial machinery               |
| 733  | 16        | General and special industrial machinery               |
| 735  | 16        | General and special industrial machinery               |
| 737  | 16        | General and special industrial machinery               |
| 741  | 16        | General and special industrial machinery               |
| 742  | 16        | General and special industrial machinery               |
| 743  | 16        | General and special industrial machinery               |
| 744  | 16        | General and special industrial machinery               |
| 745  | 16        | General and special industrial machinery               |
| 746  | 16        | General and special industrial machinery               |
| 747  | 16        | General and special industrial machinery               |
| 748  | 16        | General and special industrial machinery               |
| 749  | 16        | General and special industrial machinery               |
| 751  | 19        | Computer, communication and other electronic equipment |
| 752  | 19        | Computer, communication and other electronic equipment |
| 759  | 19        | Computer, communication and other electronic equipment |
| 761  | 19        | Computer, communication and other electronic equipment |
| 762  | 19        | Computer, communication and other electronic equipment |
| 763  | 19        | Computer, communication and other electronic equipment |
| 764  | 19        | Computer, communication and other electronic equipment |
| 771  | 18        | Electric machinery and equipment                       |
| 772  | 18        | Electric machinery and equipment                       |
| 773  | 18        | Electric machinery and equipment                       |
| 774  | 18        | Electric machinery and equipment                       |
| 775  | 18        | Electric machinery and equipment                       |
| 776  | 18        | Electric machinery and equipment                       |
| 778  | 18        | Electric machinery and equipment                       |
| 781  | 17        | Transport machinery                                    |
| 782  | 17        | Transport machinery                                    |
| 783  | 17        | Transport machinery                                    |
| 784  | 17        | Transport machinery                                    |
| 785  | 17        | Transport machinery                                    |
| 786  | 17        | Transport machinery                                    |

Table S1. *Cont.*

| SITC   | Sector ID | MIOT Sector Name                    |
|--------|-----------|-------------------------------------|
| 791    | 17        | Transport machinery                 |
| 792    | 17        | Transport machinery                 |
| 793    | 17        | Transport machinery                 |
| 961    | 17        | Transport machinery                 |
| 971    | 17        | Transport machinery                 |
| 273.12 | 5         | Non-metal minerals and other mining |
| 273.13 | 5         | Non-metal minerals and other mining |
| 661.3  | 5         | Non-metal minerals and other mining |
| 278.23 | 5         | Non-metal minerals and other mining |
| 278.91 | 5         | Non-metal minerals and other mining |
| 273.11 | 5         | Non-metal minerals and other mining |
| 272.3  | 5         | Non-metal minerals and other mining |
| 562.39 | 5         | Non-metal minerals and other mining |
| 274.1  | 5         | Non-metal minerals and other mining |
| 278.54 | 5         | Non-metal minerals and other mining |
| 278.92 | 5         | Non-metal minerals and other mining |
| 278.94 | 5         | Non-metal minerals and other mining |
| 278.99 | 5         | Non-metal minerals and other mining |
| 562    | 5         | Non-metal minerals and other mining |
| 278.3  | 5         | Non-metal minerals and other mining |
| 272.2  | 5         | Non-metal minerals and other mining |
| 278.97 | 5         | Non-metal minerals and other mining |
| 277.1  | 5         | Non-metal minerals and other mining |
| 277.2  | 5         | Non-metal minerals and other mining |
| 278.22 | 5         | Non-metal minerals and other mining |
| 278.24 | 5         | Non-metal minerals and other mining |
| 278.25 | 5         | Non-metal minerals and other mining |
| 278.4  | 5         | Non-metal minerals and other mining |
| 278.51 | 5         | Non-metal minerals and other mining |
| 278.52 | 5         | Non-metal minerals and other mining |
| 278.53 | 5         | Non-metal minerals and other mining |
| 278.61 | 5         | Non-metal minerals and other mining |
| 278.62 | 5         | Non-metal minerals and other mining |
| 278.69 | 5         | Non-metal minerals and other mining |
| 278.93 | 5         | Non-metal minerals and other mining |
| 278.95 | 5         | Non-metal minerals and other mining |
| 278.98 | 5         | Non-metal minerals and other mining |
| 667.1  | 5         | Non-metal minerals and other mining |
| 667.2  | 5         | Non-metal minerals and other mining |
| 667.3  | 5         | Non-metal minerals and other mining |
| 667.4  | 5         | Non-metal minerals and other mining |
| 273.2  | 5         | Non-metal minerals and other mining |
| 273.3  | 5         | Non-metal minerals and other mining |
| 273.4  | 5         | Non-metal minerals and other mining |
| 278.26 | 5         | Non-metal minerals and other mining |

**Table S1. Cont.**

| <b>SITC</b> | <b>Sector ID</b> | <b>MIOT Sector Name</b>                              |
|-------------|------------------|------------------------------------------------------|
| 278.27      | 5                | Non-metal minerals and other mining                  |
| 278.29      | 5                | Non-metal minerals and other mining                  |
| 662         | 5                | Non-metal minerals and other mining                  |
| 663         | 13               | Non-metallic mineral products                        |
| 664         | 13               | Non-metallic mineral products                        |
| 665         | 13               | Non-metallic mineral products                        |
| 666         | 13               | Non-metallic mineral products                        |
| 661.1       | 13               | Non-metallic mineral products                        |
| 661.2       | 13               | Non-metallic mineral products                        |
| 661.8       | 13               | Non-metallic mineral products                        |
| 322.2       | 2                | Coal mining and processing                           |
| 321         | 2                | Coal mining and processing                           |
| 322.1       | 2                | Coal mining and processing                           |
| 278.96      | 2                | Coal mining and processing                           |
| 322.3       | 2                | Coal mining and processing                           |
| 333         | 3                | Crude petroleum and natural gas products             |
| 334         | 3                | Crude petroleum and natural gas products             |
| 335         | 3                | Crude petroleum and natural gas products             |
| 343.1       | 3                | Crude petroleum and natural gas products             |
| 343.2       | 3                | Crude petroleum and natural gas products             |
| 344         | 3                | Crude petroleum and natural gas products             |
| 345         | 3                | Crude petroleum and natural gas products             |
| 342         | 3                | Crude petroleum and natural gas products             |
| 232         | 11               | Petroleum refining, coking and nuclear fuel products |
| 266         | 11               | Petroleum refining, coking and nuclear fuel products |
| 267         | 11               | Petroleum refining, coking and nuclear fuel products |
| 325         | 11               | Petroleum refining, coking and nuclear fuel products |
| 511         | 11               | Petroleum refining, coking and nuclear fuel products |
| 512         | 11               | Petroleum refining, coking and nuclear fuel products |
| 513         | 11               | Petroleum refining, coking and nuclear fuel products |
| 514         | 11               | Petroleum refining, coking and nuclear fuel products |
| 515         | 11               | Petroleum refining, coking and nuclear fuel products |
| 516         | 11               | Petroleum refining, coking and nuclear fuel products |
| 571         | 11               | Petroleum refining, coking and nuclear fuel products |
| 572         | 11               | Petroleum refining, coking and nuclear fuel products |
| 573         | 11               | Petroleum refining, coking and nuclear fuel products |
| 574         | 11               | Petroleum refining, coking and nuclear fuel products |
| 575         | 11               | Petroleum refining, coking and nuclear fuel products |
| 579         | 11               | Petroleum refining, coking and nuclear fuel products |
| 581         | 11               | Petroleum refining, coking and nuclear fuel products |
| 582         | 11               | Petroleum refining, coking and nuclear fuel products |
| 583         | 11               | Petroleum refining, coking and nuclear fuel products |
| 621         | 11               | Petroleum refining, coking and nuclear fuel products |
| 625         | 11               | Petroleum refining, coking and nuclear fuel products |
| 629         | 11               | Petroleum refining, coking and nuclear fuel products |

Table S1. *Cont.*

| SITC | Sector ID | MIOT Sector Name                                                                             |
|------|-----------|----------------------------------------------------------------------------------------------|
| 269  | 22        | Scrap and waste                                                                              |
| 522  | 12        | Chemical products                                                                            |
| 523  | 12        | Chemical products                                                                            |
| 524  | 12        | Chemical products                                                                            |
| 531  | 12        | Chemical products                                                                            |
| 532  | 12        | Chemical products                                                                            |
| 533  | 12        | Chemical products                                                                            |
| 541  | 12        | Chemical products                                                                            |
| 542  | 12        | Chemical products                                                                            |
| 551  | 12        | Chemical products                                                                            |
| 553  | 12        | Chemical products                                                                            |
| 554  | 12        | Chemical products                                                                            |
| 591  | 12        | Chemical products                                                                            |
| 592  | 12        | Chemical products                                                                            |
| 593  | 12        | Chemical products                                                                            |
| 597  | 12        | Chemical products                                                                            |
| 598  | 12        | Chemical products                                                                            |
| 651  | 7         | Textiles                                                                                     |
| 652  | 7         | Textiles                                                                                     |
| 653  | 7         | Textiles                                                                                     |
| 654  | 7         | Textiles                                                                                     |
| 655  | 7         | Textiles                                                                                     |
| 656  | 7         | Textiles                                                                                     |
| 657  | 7         | Textiles                                                                                     |
| 658  | 7         | Textiles                                                                                     |
| 659  | 7         | Textiles                                                                                     |
| 811  | 21        | Arts, crafts products and other manufacturing products                                       |
| 812  | 18        | Electric machinery and equipment                                                             |
| 813  | 18        | Electric machinery and equipment                                                             |
| 821  | 9         | Sawmills, fibreboard, furniture and products of wood, bamboo, cane, palm, straw, <i>etc.</i> |
| 831  | 20        | Instruments, meters, other measuring equipment and office equipment                          |
| 841  | 8         | Wearing apparel, leather, furs, down and related products                                    |
| 842  | 8         | Wearing apparel, leather, furs, down and related products                                    |
| 843  | 8         | Wearing apparel, leather, furs, down and related products                                    |
| 844  | 8         | Wearing apparel, leather, furs, down and related products                                    |
| 845  | 8         | Wearing apparel, leather, furs, down and related products                                    |
| 846  | 8         | Wearing apparel, leather, furs, down and related products                                    |
| 848  | 8         | Wearing apparel, leather, furs, down and related products                                    |
| 851  | 8         | Wearing apparel, leather, furs, down and related products                                    |
| 871  | 20        | Instruments, meters, other measuring equipment and office equipment                          |
| 872  | 20        | Instruments, meters, other measuring equipment and office equipment                          |
| 873  | 20        | Instruments, meters, other measuring equipment and office equipment                          |
| 874  | 20        | Instruments, meters, other measuring equipment and office equipment                          |
| 881  | 20        | Instruments, meters, other measuring equipment and office equipment                          |
| 882  | 20        | Instruments, meters, other measuring equipment and office equipment                          |

**Table S1. Cont.**

| SITC | Sector ID | MIOT Sector Name                                                                    |
|------|-----------|-------------------------------------------------------------------------------------|
| 883  | 20        | Instruments, meters, other measuring equipment and office equipment                 |
| 884  | 20        | Instruments, meters, other measuring equipment and office equipment                 |
| 885  | 20        | Instruments, meters, other measuring equipment and office equipment                 |
| 891  | 21        | Arts, crafts products and other manufacturing products                              |
| 892  | 10        | Paper, printing, record medium reproduction, cultural goods and recreation products |
| 893  | 21        | Arts, crafts products and other manufacturing products                              |
| 894  | 20        | Instruments, meters, other measuring equipment and office equipment                 |
| 895  | 20        | Instruments, meters, other measuring equipment and office equipment                 |
| 896  | 21        | Arts, crafts products and other manufacturing products                              |
| 897  | 21        | Arts, crafts products and other manufacturing products                              |
| 898  | 21        | Arts, crafts products and other manufacturing products                              |
| 899  | 21        | Arts, crafts products and other manufacturing products                              |
| 599  | 22        | Scrap and waste                                                                     |

**Table S2.** Commodity allocation of material production sectors and EW-MFA import categories.

| EW-MFA Code | SITC  | Name                                                                                                                          |
|-------------|-------|-------------------------------------------------------------------------------------------------------------------------------|
| 2.1.1.1     | 41    | Wheat (including spelt) and meslin, unmilled                                                                                  |
| 2.1.1.1     | 42    | Rice                                                                                                                          |
| 2.1.1.1     | 43    | Barley, unmilled                                                                                                              |
| 2.1.1.1     | 44    | Maize (not including sweet corn), unmilled                                                                                    |
| 2.1.1.1     | 45    | Cereals, unmilled (other than wheat, rice, barley and maize)                                                                  |
| 2.1.1.1     | 46    | Meal and flour of wheat and flour of meslin                                                                                   |
| 2.1.1.1     | 47    | Other cereal meals and flours                                                                                                 |
| 2.1.1.1     | 48    | Cereal preparations and preparations of flour or starch of fruits or vegetables                                               |
| 2.1.1.2     | 54.1  | Potatoes, fresh or chilled (not including sweet potatoes)                                                                     |
| 2.1.1.2     | 56.41 | Flour and meal of potatoes                                                                                                    |
| 2.1.1.2     | 56.42 | Flakes, granules and pellets of potatoes                                                                                      |
| 2.1.1.2     | 56.45 | Tapioca and substitutes therefor prepared from starch, in the form of flakes, grains, pearls, siftings or in similar forms    |
| 2.1.1.2     | 56.47 | Flour and meal of sago, roots or tubers of headings 054.81 and 054.83                                                         |
| 2.1.1.2     | 56.61 | Potatoes prepared or preserved otherwise than by vinegar or acetic acid, frozen                                               |
| 2.1.1.3     | 61.1  | Sugars, beet or cane, raw, in solid form, not containing added flavouring or colouring matter                                 |
| 2.1.1.3     | 61.2  | Other beet or cane sugar and chemically pure sucrose, in solid form                                                           |
| 2.1.1.3     | 61.5  | Molasses resulting from the extraction or refining of sugar                                                                   |
| 2.1.1.4     | 54.2  | Leguminous vegetables, dried, shelled, whether or not skinned or split.                                                       |
| 2.1.1.4     | 56.46 | Flour and meal of the dried leguminous vegetables of subgroup 054.2                                                           |
| 2.1.1.5     | 57.7  | Edible nuts (excluding nuts chiefly used for the extraction of oil), fresh or dried, whether or not shelled or peeled         |
| 2.1.1.5     | 58.92 | Nuts, groundnuts and other seeds, n.e.s.                                                                                      |
| 2.1.1.6     | 222   | Oil-seeds and oleaginous fruits of a kind used for the extraction of “soft” fixed vegetable oils (excluding flours and meals) |

Table S2. *Cont.*

| EW-MFA Code | SITC  | Name                                                                                                                                                                                     |
|-------------|-------|------------------------------------------------------------------------------------------------------------------------------------------------------------------------------------------|
| 2.1.1.6     | 223   | Oil-seeds and oleaginous fruits, whole or broken, of a kind used for the extraction of other fixed vegetable oils (including flours and meals of oil-seeds or oleaginous fruit, n.e.s.)  |
| 2.1.1.7     | 54.4  | Tomatoes, fresh or chilled                                                                                                                                                               |
| 2.1.1.7     | 54.5  | Other fresh or chilled vegetables                                                                                                                                                        |
| 2.1.1.7     | 54.6  | Vegetables (uncooked or cooked by steaming or boiling in water), frozen                                                                                                                  |
| 2.1.1.7     | 54.7  | Vegetables provisionally preserved (e.g., by sulphur dioxide gas, in brine, in sulphur water or in other preservative solutions), but unsuitable in that state for immediate consumption |
| 2.1.1.7     | 54.8  | Vegetable products, roots and tubers, chiefly for human food, n.e.s., fresh, dried or chilled                                                                                            |
| 2.1.1.7     | 56.1  | Vegetables, dried (excluding leguminous vegetables), whole, cut, sliced, broken or in powder, but not further prepared                                                                   |
| 2.1.1.7     | 56.69 | Other vegetables and mixtures of vegetables prepared or preserved otherwise than by vinegar or acetic acid, frozen                                                                       |
| 2.1.1.7     | 56.7  | Vegetables, prepared or preserved, n.e.s.                                                                                                                                                |
| 2.1.1.8     | 56.48 | Flour, meal and powder of the products of any heading of group 057                                                                                                                       |
| 2.1.1.8     | 57    | Fruit and nuts (not including oil nuts), fresh or dried                                                                                                                                  |
| 2.1.1.8     | 58    | Fruit, preserved, and fruit preparations (excluding fruit juices)                                                                                                                        |
| 2.1.1.8     | 59    | Fruit juices (including grape must) and vegetable juices, unfermented and not containing added spirit, whether or not containing added sugar or other sweetening matter                  |
| 2.1.1.9     | 263   | Cotton                                                                                                                                                                                   |
| 2.1.1.9     | 264   | Jute and other textile bast fibres, n.e.s., raw or processed but not spun; tow and waste of these fibres (including yarn waste and garnetted stock)                                      |
| 2.1.1.9     | 265   | Vegetable textile fibres (other than cotton and jute), raw or processed but not spun; waste of these fibres                                                                              |
| 2.1.1.10    | 71    | Coffee and coffee substitutes                                                                                                                                                            |
| 2.1.1.10    | 72    | Cocoa                                                                                                                                                                                    |
| 2.1.1.10    | 73    | Chocolate and other food preparations containing cocoa, n.e.s.                                                                                                                           |
| 2.1.1.10    | 74    | Tea and mate                                                                                                                                                                             |
| 2.1.1.10    | 75    | Spices                                                                                                                                                                                   |
| 2.1.1.10    | 121   | Tobacco, unmanufactured; tobacco refuse                                                                                                                                                  |
| 2.1.1.10    | 122   | Tobacco, manufactured (whether or not containing tobacco substitutes)                                                                                                                    |
| 2.1.2.1.1   | 81.11 | Cereal straw and husks, unprepared, whether or not chopped, ground, pressed or in the form of pellets                                                                                    |
| 2.1.2.2.1   | 81.12 | Lucerne (alfalfa) meal and pellets                                                                                                                                                       |
| 2.1.2.2.1   | 81.13 | Swedes, mangolds, fodder roots, hay, clover, sainfoin, forage kale, lupines, vetches and similar forage products, whether or not in the form of pellets                                  |
| 2.1.3.1     | 246   | Wood in chips or particles and wood waste                                                                                                                                                |
| 2.1.3.1     | 247   | Wood in the rough, whether or not stripped of bark or sapwood, or roughly squared                                                                                                        |
| 2.1.3.1     | 248   | Wood, simply worked, and railway sleepers of wood                                                                                                                                        |
| 2.1.3.1     | 634   | Veneers, plywood, particle board, and other wood, worked, n.e.s.                                                                                                                         |
| 2.1.3.1     | 635   | Wood manufactures, n.e.s.                                                                                                                                                                |

Table S2. *Cont.*

| EW-MFA Code | SITC   | Name                                                                                                                                                                                                                                                                                                                                                                  |
|-------------|--------|-----------------------------------------------------------------------------------------------------------------------------------------------------------------------------------------------------------------------------------------------------------------------------------------------------------------------------------------------------------------------|
| 2.1.3.2     | 245    | Fuel wood (excluding wood waste) and wood charcoal                                                                                                                                                                                                                                                                                                                    |
| 2.1.3.2     | 633    | Cork manufactures                                                                                                                                                                                                                                                                                                                                                     |
| 2.1.3.2     | 231    | Natural rubber, balata, gutta-percha, guayule, chicle and similar natural gums, in primary forms (including latex) or in plates, sheets or strip                                                                                                                                                                                                                      |
| 2.1.3.2     | 244    | Cork, natural, raw and waste (including natural cork in blocks or sheets)                                                                                                                                                                                                                                                                                             |
| 2.1.4.1     | 34     | Fish, fresh (live or dead), chilled or frozen                                                                                                                                                                                                                                                                                                                         |
| 2.1.4.1     | 35     | Fish, dried, salted or in brine; smoked fish (whether or not cooked before or during the smoking process); flours, meals and pellets of fish, fit for human consumption                                                                                                                                                                                               |
| 2.1.4.1     | 37.1   | Fish, prepared or preserved, n.e.s.; caviar and caviar substitutes prepared from fish eggs.                                                                                                                                                                                                                                                                           |
| 2.1.4.2     | 36     | Crustaceans, molluscs and aquatic invertebrates, whether in shell or not, fresh (live or dead), chilled, frozen, dried, salted or in brine; crustaceans, in shell, cooked by steaming or boiling in water, whether or not chilled, frozen, dried, salted or in brine; flours, meals and pellets of crustaceans or of aquatic invertebrates, fit for human consumption |
| 2.1.4.2     | 37.2   | Crustaceans, molluscs and other aquatic invertebrates, prepared or preserved, n.e.s.                                                                                                                                                                                                                                                                                  |
| 2.1.4.2     | 292.97 | Seaweeds and other algae                                                                                                                                                                                                                                                                                                                                              |
| 2.1.6.1     | 1      | Live animals other than animals of division 03                                                                                                                                                                                                                                                                                                                        |
| 2.1.6.2     | 11     | Meat of bovine animals, fresh, chilled or frozen                                                                                                                                                                                                                                                                                                                      |
| 2.1.6.2     | 12     | Other meat and edible meat offal, fresh, chilled or frozen (except meat and meat offal unfit or unsuitable for human consumption)                                                                                                                                                                                                                                     |
| 2.1.6.2     | 16     | Meat and edible meat offal, salted, in brine, dried or smoked; edible flours and meals of meat or meat offal                                                                                                                                                                                                                                                          |
| 2.1.6.2     | 17     | Meat and edible meat offal, prepared or preserved, n.e.s.                                                                                                                                                                                                                                                                                                             |
| 2.1.6.3     | 22     | Milk and cream and milk products other than butter or cheese                                                                                                                                                                                                                                                                                                          |
| 2.1.6.3     | 23     | Butter and other fats and oils derived from milk                                                                                                                                                                                                                                                                                                                      |
| 2.1.6.3     | 24     | Cheese and curd                                                                                                                                                                                                                                                                                                                                                       |
| 2.1.6.3     | 25     | Eggs, birds', and egg yolks, fresh, dried or otherwise preserved, sweetened or not; egg albumin                                                                                                                                                                                                                                                                       |
| 2.1.6.3     | 61.6   | Natural honey                                                                                                                                                                                                                                                                                                                                                         |
| 2.1.6.4     | 261    | Silk                                                                                                                                                                                                                                                                                                                                                                  |
| 2.1.6.4     | 268    | Wool and other animal hair (including wool tops)                                                                                                                                                                                                                                                                                                                      |
| 2.1.6.4     | 291    | Crude animal materials, n.e.s.                                                                                                                                                                                                                                                                                                                                        |
| 2.1.6.4     | 211    | Hides and skins (except furskins), raw                                                                                                                                                                                                                                                                                                                                |
| 2.1.6.4     | 212    | Furskins, raw (including heads, tails, paws and other pieces or cuttings, suitable for furriers' use), other than hides and skins of group 211                                                                                                                                                                                                                        |
| 2.1.6.4     | 411    | Animal oils and fats                                                                                                                                                                                                                                                                                                                                                  |
| 2.1.6.4     | 431    | Animal or vegetable fats and oils, processed; waxes; inedible mixtures or preparations of animal or vegetable fats or oils, n.e.s.                                                                                                                                                                                                                                    |
| 2.1.6.4     | 611    | Leather                                                                                                                                                                                                                                                                                                                                                               |
| 2.1.6.4     | 612    | Manufactures of leather or of composition leather, n.e.s.; saddlery and harness                                                                                                                                                                                                                                                                                       |

Table S2. *Cont.*

| EW-MFA Code | SITC  | Name                                                                                                                                                                                                                                 |
|-------------|-------|--------------------------------------------------------------------------------------------------------------------------------------------------------------------------------------------------------------------------------------|
| 2.1.6.4     | 613   | Furskins, tanned or dressed (including heads, tails, paws and other pieces or cuttings), unassembled, or assembled (without the addition of other materials), other than those of heading 848.31                                     |
| 2.1.7       | 81.19 | Vegetable residues and by-products, vegetable materials and vegetable waste, whether or not in the form of pellets, of a kind used for animal food, n.e.s.                                                                           |
| 2.1.7       | 81.2  | Bran, sharps and other residues, whether or not in the form of pellets, derived from the sifting, milling or other working of cereals or of leguminous plants                                                                        |
| 2.1.7       | 81.3  | Oil-cake and other solid residues (except dregs), whether or not ground or in the form of pellets, resulting from the extraction of fats or oils from oil-seeds, oleaginous fruits and germs of cereals                              |
| 2.1.7       | 81.4  | Flours, meals and pellets, of meat or meat offal, of fish or of crustaceans, molluscs or other aquatic invertebrates, unfit for human consumption; greaves                                                                           |
| 2.1.7       | 81.5  | Residues of starch manufacture and similar residues, beet pulp, bagasse and other waste of sugar manufacture, brewing or distilling dregs and waste, whether or not in the form of pellets                                           |
| 2.1.7       | 81.9  | Food wastes and prepared animal feeds, n.e.s.                                                                                                                                                                                        |
| 2.1.7       | 61.9  | Other sugars (including chemically pure lactose, maltose, glucose and fructose in solid form); sugar syrups not containing added flavouring or colouring matter; artificial honey (whether or not mixed with natural honey); caramel |
| 2.1.7       | 62    | Sugar confectionery                                                                                                                                                                                                                  |
| 2.1.7       | 91    | Margarine and shortening                                                                                                                                                                                                             |
| 2.1.7       | 98    | Edible products and preparations, n.e.s.                                                                                                                                                                                             |
| 2.1.7       | 111   | Non-alcoholic beverages, n.e.s.                                                                                                                                                                                                      |
| 2.1.7       | 112   | Alcoholic beverages                                                                                                                                                                                                                  |
| 2.1.7       | 251   | Pulp and waste paper                                                                                                                                                                                                                 |
| 2.1.7       | 272.1 | Animal or vegetable fertilizers, whether or not mixed together or chemically treated; fertilizers produced by the mixing or chemical treatment of animal or vegetable products                                                       |
| 2.1.7       | 292   | Crude vegetable materials, n.e.s.                                                                                                                                                                                                    |
| 2.1.7       | 421   | Fixed vegetable fats and oils, "soft", crude, refined or fractionated                                                                                                                                                                |
| 2.1.7       | 422   | Fixed vegetable fats and oils, crude, refined or fractionated, other than "soft"                                                                                                                                                     |
| 2.1.7       | 641   | Paper and paperboard                                                                                                                                                                                                                 |
| 2.1.7       | 642   | Paper and paperboard, cut to size or shape, and articles of paper or paperboard                                                                                                                                                      |
| 2.2.1       | 274.2 | Iron pyrites, unroasted                                                                                                                                                                                                              |
| 2.2.1       | 281   | Iron ore and concentrates                                                                                                                                                                                                            |
| 2.2.1       | 282   | Ferrous waste and scrap; remelting scrap ingots of iron or steel                                                                                                                                                                     |
| 2.2.1       | 671   | Pig-iron, spiegeleisen, sponge iron, iron or steel granules and powders and ferroalloys                                                                                                                                              |
| 2.2.1       | 672   | Ingots and other primary forms, of iron or steel; semi-finished products of iron or steel                                                                                                                                            |
| 2.2.1       | 673   | Flat-rolled products of iron or non-alloy steel, not clad, plated or coated                                                                                                                                                          |
| 2.2.1       | 674   | Flat-rolled products of iron or non-alloy steel, clad, plated or coated                                                                                                                                                              |
| 2.2.1       | 675   | Flat-rolled products of alloy steel                                                                                                                                                                                                  |
| 2.2.1       | 676   | Iron and steel bars, rods, angles, shapes and sections (including sheet piling)                                                                                                                                                      |

Table S2. *Cont.*

| EW-MFA Code | SITC   | Name                                                                                                                                                         |
|-------------|--------|--------------------------------------------------------------------------------------------------------------------------------------------------------------|
| 2.2.1       | 677    | Rails or railway track construction material, of iron or steel                                                                                               |
| 2.2.1       | 678    | Wire of iron or steel                                                                                                                                        |
| 2.2.1       | 679    | Tubes, pipes and hollow profiles, and tube or pipe fittings, of iron or steel                                                                                |
| 2.2.1       | 693.11 | Stranded wire, ropes, cables, plaited bands, slings and the like of iron or steel, not electrically insulated                                                |
| 2.2.1       | 693.2  | Barbed wire of iron or steel; twisted hoop or single flat wire, barbed or not, and loosely twisted double wire, of a kind used for fencing, of iron or steel |
| 2.2.1       | 693.5  | Cloth (including endless bands), grill, netting and fencing, of iron or steel wire; expanded metal of iron or steel                                          |
| 2.2.2.1     | 283    | Copper ores and concentrates; copper mattes; cement copper                                                                                                   |
| 2.2.2.1     | 288.21 | Copper waste and scrap                                                                                                                                       |
| 2.2.2.1     | 682    | Copper                                                                                                                                                       |
| 2.2.2.1     | 693.12 | Stranded wire, ropes, cables, plaited bands, slings and the like of copper, not electrically insulated                                                       |
| 2.2.2.2     | 284    | Nickel ores and concentrates; nickel mattes, nickel oxide sinters and other intermediate products of nickel metallurgy                                       |
| 2.2.2.2     | 288.22 | Nickel waste and scrap                                                                                                                                       |
| 2.2.2.2     | 683    | Nickel                                                                                                                                                       |
| 2.2.2.3     | 287.4  | Lead ores and concentrates                                                                                                                                   |
| 2.2.2.3     | 288.24 | Lead waste and scrap                                                                                                                                         |
| 2.2.2.3     | 685    | Lead                                                                                                                                                         |
| 2.2.2.4     | 287.5  | Zinc ores and concentrates                                                                                                                                   |
| 2.2.2.4     | 288.25 | Zinc waste and scrap (other than dust)                                                                                                                       |
| 2.2.2.4     | 686    | Zinc                                                                                                                                                         |
| 2.2.2.5     | 287.6  | Tin ores and concentrates                                                                                                                                    |
| 2.2.2.5     | 288.26 | Tin waste and scrap                                                                                                                                          |
| 2.2.2.5     | 687    | Tin                                                                                                                                                          |
| 2.2.2.6     | 289    | Ores and concentrates of precious metals; waste, scrap and sweepings of precious metals (other than of gold)                                                 |
| 2.2.2.6     | 681    | Silver, platinum and other metals of the platinum group                                                                                                      |
| 2.2.2.7     | 285    | Aluminium ores and concentrates (including alumina)                                                                                                          |
| 2.2.2.7     | 288.23 | Aluminium waste and scrap                                                                                                                                    |
| 2.2.2.7     | 684    | Aluminium                                                                                                                                                    |
| 2.2.2.7     | 693.13 | Stranded wire, ropes, cables, plaited bands, slings and the like of aluminium, not electrically insulated                                                    |
| 2.2.2.8     | 286    | Uranium or thorium ores and concentrates                                                                                                                     |
| 2.2.2.8     | 525    | Radioactive and associated materials                                                                                                                         |
| 2.2.2.9     | 287.7  | Manganese ores and concentrates (including manganiferous iron ores and concentrates with a manganese content of 20% or more calculated on the dry weight)    |
| 2.2.2.9     | 287.8  | Ores and concentrates of molybdenum, niobium, tantalum, titanium, vanadium and zirconium                                                                     |
| 2.2.2.9     | 287.9  | Ores and concentrates of other non-ferrous base metals                                                                                                       |

Table S2. *Cont.*

| EW-MFA Code | SITC  | Name                                                                                                                                                                                                                                                                                                         |
|-------------|-------|--------------------------------------------------------------------------------------------------------------------------------------------------------------------------------------------------------------------------------------------------------------------------------------------------------------|
| 2.2.2.9     | 288.1 | Slag, ash and residues (other than from the manufacture of iron or steel) containing metals, arsenic, or their compounds                                                                                                                                                                                     |
| 2.2.2.9     | 689   | Miscellaneous non-ferrous base metals employed in metallurgy, and cermets                                                                                                                                                                                                                                    |
| 2.2.3       | 691   | Structures and parts of structures, n.e.s., of iron, steel or aluminium                                                                                                                                                                                                                                      |
| 2.2.3       | 692   | Metal containers for storage or transport                                                                                                                                                                                                                                                                    |
| 2.2.3       | 694   | Nails, screws, nuts, bolts, rivets and the like, of iron, steel, copper or aluminium                                                                                                                                                                                                                         |
| 2.2.3       | 695   | Tools for use in the hand or in machines                                                                                                                                                                                                                                                                     |
| 2.2.3       | 696   | Cutlery                                                                                                                                                                                                                                                                                                      |
| 2.2.3       | 697   | Household equipment of base metal, n.e.s.                                                                                                                                                                                                                                                                    |
| 2.2.3       | 699   | Manufactures of base metal, n.e.s.                                                                                                                                                                                                                                                                           |
| 2.2.3       | 711   | Steam or other vapour-generating boilers, superheated water boilers, and auxiliary plant for use therewith; parts thereof                                                                                                                                                                                    |
| 2.2.3       | 712   | Steam turbines and other vapour turbines and parts thereof, n.e.s.                                                                                                                                                                                                                                           |
| 2.2.3       | 713   | Internal combustion piston engines and parts thereof, n.e.s.                                                                                                                                                                                                                                                 |
| 2.2.3       | 714   | Engines and motors, non-electric (other than those of groups 712, 713 and 718); parts, n.e.s., of these engines and motors                                                                                                                                                                                   |
| 2.2.3       | 716   | Rotating electric plant and parts thereof, n.e.s.                                                                                                                                                                                                                                                            |
| 2.2.3       | 718   | Power-generating machinery and parts thereof, n.e.s.                                                                                                                                                                                                                                                         |
| 2.2.3       | 721   | Agricultural machinery (excluding tractors) and parts thereof                                                                                                                                                                                                                                                |
| 2.2.3       | 722   | Tractors (other than those of headings 744.14 and 744.15)                                                                                                                                                                                                                                                    |
| 2.2.3       | 723   | Civil engineering and contractors' plant and equipment; parts thereof                                                                                                                                                                                                                                        |
| 2.2.3       | 724   | Textile and leather machinery and parts thereof, n.e.s.                                                                                                                                                                                                                                                      |
| 2.2.3       | 725   | Paper mill and pulp mill machinery, papercutting machines and other machinery for the manufacture of paper articles; parts thereof                                                                                                                                                                           |
| 2.2.3       | 726   | Printing and bookbinding machinery and parts thereof                                                                                                                                                                                                                                                         |
| 2.2.3       | 727   | Food-processing machines (excluding domestic); parts thereof                                                                                                                                                                                                                                                 |
| 2.2.3       | 728   | Other machinery and equipment specialized for particular industries; parts thereof, n.e.s.                                                                                                                                                                                                                   |
| 2.2.3       | 731   | Machine tools working by removing metal or other material                                                                                                                                                                                                                                                    |
| 2.2.3       | 733   | Machine tools for working metal, sintered metal carbides or cermets, without removing material                                                                                                                                                                                                               |
| 2.2.3       | 735   | Parts, n.e.s., and accessories suitable for use solely or principally with the machines falling within groups 731 and 733 (including work or tool holders, self-opening dieheads, dividing heads and other special attachments for machine tools); tool holders for any type of tool for working in the hand |
| 2.2.3       | 737   | Metalworking machinery (other than machine tools) and parts thereof, n.e.s.                                                                                                                                                                                                                                  |
| 2.2.3       | 741   | Heating and cooling equipment and parts thereof, n.e.s.                                                                                                                                                                                                                                                      |
| 2.2.3       | 742   | Pumps for liquids, whether or not fitted with a measuring device; liquid elevators; parts for such pumps and liquid elevators                                                                                                                                                                                |
| 2.2.3       | 743   | Pumps (other than pumps for liquids), air or other gas compressors and fans; ventilating or recycling hoods incorporating a fan, whether or not fitted with filters; centrifuges; filtering or purifying apparatus; parts thereof                                                                            |
| 2.2.3       | 744   | Mechanical handling equipment and parts thereof, n.e.s.                                                                                                                                                                                                                                                      |

Table S2. *Cont.*

| EW-MFA Code | SITC | Name                                                                                                                                                                                                                                                                                                                                                                                                                                                                                                                                                                                                                                                                                                                     |
|-------------|------|--------------------------------------------------------------------------------------------------------------------------------------------------------------------------------------------------------------------------------------------------------------------------------------------------------------------------------------------------------------------------------------------------------------------------------------------------------------------------------------------------------------------------------------------------------------------------------------------------------------------------------------------------------------------------------------------------------------------------|
| 2.2.3       | 745  | Non-electrical machinery, tools and mechanical apparatus and parts thereof, n.e.s.                                                                                                                                                                                                                                                                                                                                                                                                                                                                                                                                                                                                                                       |
| 2.2.3       | 746  | Ball- or roller bearings                                                                                                                                                                                                                                                                                                                                                                                                                                                                                                                                                                                                                                                                                                 |
| 2.2.3       | 747  | Taps, cocks, valves and similar appliances for pipes, boiler shells, tanks, vats or the like, including pressure-reducing valves and thermostatically controlled valves                                                                                                                                                                                                                                                                                                                                                                                                                                                                                                                                                  |
| 2.2.3       | 748  | Transmission shafts (including camshafts and crankshafts) and cranks; bearing housings and plain shaft bearings; gears and gearing; ball or roller screws; gearboxes and other speed changers (including torque converters); flywheels and pulleys (including pulley blocks); clutches and shaft couplings (including universal joints); articulated link chain; parts thereof                                                                                                                                                                                                                                                                                                                                           |
| 2.2.3       | 749  | Non-electric parts and accessories of machinery, n.e.s.                                                                                                                                                                                                                                                                                                                                                                                                                                                                                                                                                                                                                                                                  |
| 2.2.3       | 751  | Office machines                                                                                                                                                                                                                                                                                                                                                                                                                                                                                                                                                                                                                                                                                                          |
| 2.2.3       | 752  | Automatic data-processing machines and units thereof; magnetic or optical readers, machines for transcribing data onto data media in coded form and machines for processing such data, n.e.s.                                                                                                                                                                                                                                                                                                                                                                                                                                                                                                                            |
| 2.2.3       | 759  | Parts and accessories (other than covers, carrying cases and the like) suitable for use solely or principally with machines falling within groups 751 and 752                                                                                                                                                                                                                                                                                                                                                                                                                                                                                                                                                            |
| 2.2.3       | 761  | Monitors and projectors, not incorporating television reception apparatus; reception apparatus for television, whether or not incorporating radio-broadcast receivers or sound or video recording or reproducing apparatus                                                                                                                                                                                                                                                                                                                                                                                                                                                                                               |
| 2.2.3       | 762  | Reception apparatus for radiobroadcasting, whether or not combined, in the same housing, with sound recording or reproducing apparatus or a clock                                                                                                                                                                                                                                                                                                                                                                                                                                                                                                                                                                        |
| 2.2.3       | 763  | Sound recording or reproducing apparatus; video recording or reproducing apparatus; whether or not incorporating a video tuner                                                                                                                                                                                                                                                                                                                                                                                                                                                                                                                                                                                           |
| 2.2.3       | 764  | Telecommunications equipment, n.e.s., and parts, n.e.s., and accessories of apparatus falling within division 76                                                                                                                                                                                                                                                                                                                                                                                                                                                                                                                                                                                                         |
| 2.2.3       | 771  | Electric power machinery (other than rotating electric plant of group 716) and parts thereof                                                                                                                                                                                                                                                                                                                                                                                                                                                                                                                                                                                                                             |
| 2.2.3       | 772  | Electrical apparatus for switching or protecting electrical circuits or for making connections to or in electrical circuits (e.g., switches, relays, fuses, lightning arresters, voltage limiters, surge suppressors, plugs and sockets, lampholders and junction boxes); electrical resistors (including rheostats and potentiometers), other than heating resistors; printed circuits; boards, panels (including numerical control panels), consoles, desks, cabinets and other bases, equipped with two or more apparatus for switching, protecting or for making connections to or in electrical circuits, for electric control or the distribution of electricity (excluding switching apparatus of subgroup 764.1) |
| 2.2.3       | 773  | Equipment for distributing electricity, n.e.s.                                                                                                                                                                                                                                                                                                                                                                                                                                                                                                                                                                                                                                                                           |
| 2.2.3       | 774  | Electrodiagnostic apparatus for medical, surgical, dental or veterinary purposes, and radiological apparatus                                                                                                                                                                                                                                                                                                                                                                                                                                                                                                                                                                                                             |
| 2.2.3       | 775  | Household-type electrical and nonelectrical equipment, n.e.s.                                                                                                                                                                                                                                                                                                                                                                                                                                                                                                                                                                                                                                                            |

Table S2. *Cont.*

| EW-MFA Code | SITC   | Name                                                                                                                                                                                                                                                                                                                                                                                                                           |
|-------------|--------|--------------------------------------------------------------------------------------------------------------------------------------------------------------------------------------------------------------------------------------------------------------------------------------------------------------------------------------------------------------------------------------------------------------------------------|
| 2.2.3       | 776    | Thermionic, cold cathode or photo-cathode valves and tubes (e.g., vacuum or vapour or gas-filled valves and tubes, mercury arc rectifying valves and tubes, cathode-ray tubes, television camera tubes); diodes, transistors and similar semiconductor devices; photosensitive semiconductor devices; light-emitting diodes; mounted piezoelectric crystals; electronic integrated circuits and microassemblies; parts thereof |
| 2.2.3       | 778    | Electrical machinery and apparatus, n.e.s.                                                                                                                                                                                                                                                                                                                                                                                     |
| 2.2.3       | 781    | Motor cars and other motor vehicles principally designed for the transport of persons (other than motor vehicles for the transport of ten or more persons, including the driver), including station-wagons and racing cars                                                                                                                                                                                                     |
| 2.2.3       | 782    | Motor vehicles for the transport of goods and special-purpose motor vehicles                                                                                                                                                                                                                                                                                                                                                   |
| 2.2.3       | 783    | Road motor vehicles, n.e.s.                                                                                                                                                                                                                                                                                                                                                                                                    |
| 2.2.3       | 784    | Parts and accessories of the motor vehicles of groups 722, 781, 782 and 783                                                                                                                                                                                                                                                                                                                                                    |
| 2.2.3       | 785    | Motor cycles (including mopeds) and cycles, motorized and non-motorized; invalid carriages                                                                                                                                                                                                                                                                                                                                     |
| 2.2.3       | 786    | Trailers and semi-trailers; other vehicles, not mechanically-propelled; specially designed and equipped transport containers                                                                                                                                                                                                                                                                                                   |
| 2.2.3       | 791    | Railway vehicles (including hovertrains) and associated equipment                                                                                                                                                                                                                                                                                                                                                              |
| 2.2.3       | 792    | Aircraft and associated equipment; spacecraft (including satellites) and spacecraft launch vehicles; parts thereof                                                                                                                                                                                                                                                                                                             |
| 2.2.3       | 793    | Ships, boats (including hovercraft) and floating structures                                                                                                                                                                                                                                                                                                                                                                    |
| 2.2.3       | 961    | Coin (other than gold coin), not being legal tender                                                                                                                                                                                                                                                                                                                                                                            |
| 2.2.3       | 971    | Gold, non-monetary (excluding gold ores and concentrates)                                                                                                                                                                                                                                                                                                                                                                      |
| 2.3.1.1     | 273.12 | Marble, travertine, ecaussine and other calcareous monumental or building stone of an apparent specific gravity of 2.5 or more, and alabaster, whether or not roughly trimmed or merely cut, by sawing or otherwise, into blocks or slabs of a rectangular (including square) shape.                                                                                                                                           |
| 2.3.1.1     | 273.13 | Granite, porphyry, basalt, sandstone and other monumental or building stone, n.e.s., whether or not roughly trimmed or merely cut, by sawing or otherwise, into blocks or slabs of a rectangular (including square) shape.                                                                                                                                                                                                     |
| 2.3.1.1     | 661.3  | Monumental or building stone, worked, and articles thereof                                                                                                                                                                                                                                                                                                                                                                     |
| 2.3.1.2     | 278.23 | Dolomite, whether or not calcined; dolomite roughly trimmed or merely cut, by sawing or otherwise, into blocks or slabs of a rectangular (including square) shape; agglomerated dolomite (including tarred dolomite)                                                                                                                                                                                                           |
| 2.3.1.2     | 278.91 | Chalk                                                                                                                                                                                                                                                                                                                                                                                                                          |
| 2.3.1.3     | 273.11 | Slate, whether or not roughly trimmed or merely cut, by sawing or otherwise, into blocks or slabs of a rectangular (including square) shape                                                                                                                                                                                                                                                                                    |
| 2.3.1.4     | 272.3  | Natural calcium phosphates, natural aluminium calcium phosphates and phosphatic chalk.                                                                                                                                                                                                                                                                                                                                         |
| 2.3.1.4     | 562.39 | Mineral or chemical fertilizers, potassic, n.e.s.                                                                                                                                                                                                                                                                                                                                                                              |
| 2.3.1.4     | 274.1  | Sulphur of all kinds, other than sublimed sulphur, precipitated sulphur and colloidal sulphur                                                                                                                                                                                                                                                                                                                                  |
| 2.3.1.4     | 278.54 | Fluorspar                                                                                                                                                                                                                                                                                                                                                                                                                      |

Table S2. *Cont.*

| EW-MFA Code | SITC   | Name                                                                                                                                                                                                                                                   |
|-------------|--------|--------------------------------------------------------------------------------------------------------------------------------------------------------------------------------------------------------------------------------------------------------|
| 2.3.1.4     | 278.92 | Natural barium sulphate (barytes); natural barium carbonate (witherite), whether or not calcined (other than barium oxide of heading 522.65)                                                                                                           |
| 2.3.1.4     | 278.94 | Natural borates and concentrates thereof, whether or not calcined, but not including borates separated from natural brine; natural boric acid containing not more than 85% of h3bo3 calculated on the dry weight                                       |
| 2.3.1.4     | 278.99 | Mineral substances, n.e.s.                                                                                                                                                                                                                             |
| 2.3.1.4     | 562    | Fertilizers (other than those of group 272)                                                                                                                                                                                                            |
| 2.3.1.5     | 278.3  | Sodium chloride, pure, and common salt (including table salt and denatured salt), whether or not in aqueous solution or containing added anti-caking or free-flowing agents; sea water.                                                                |
| 2.3.1.6     | 272.2  | Sodium nitrate                                                                                                                                                                                                                                         |
| 2.3.1.6     | 278.97 | Bitumen and asphalt, natural; asphaltites and asphaltic rocks                                                                                                                                                                                          |
| 2.3.1.6     | 277.1  | Industrial diamonds, sorted, whether or not worked                                                                                                                                                                                                     |
| 2.3.1.6     | 277.2  | Natural abrasives, n.e.s.                                                                                                                                                                                                                              |
| 2.3.1.6     | 278.22 | Graphite, natural                                                                                                                                                                                                                                      |
| 2.3.1.6     | 278.24 | Natural magnesium carbonate (magnesite)                                                                                                                                                                                                                |
| 2.3.1.6     | 278.25 | Fused magnesia; dead-burned (sintered) magnesia; other magnesium oxide, whether or not pure                                                                                                                                                            |
| 2.3.1.6     | 278.4  | Asbestos                                                                                                                                                                                                                                               |
| 2.3.1.6     | 278.51 | Quartz (other than natural sands); quartzite, whether or not roughly trimmed or merely cut, by sawing or otherwise, into blocks or slabs of a rectangular (including square) shape                                                                     |
| 2.3.1.6     | 278.52 | Mica (including splittings); mica waste                                                                                                                                                                                                                |
| 2.3.1.6     | 278.53 | Feldspar; leucite; nepheline and nepheline syenite                                                                                                                                                                                                     |
| 2.3.1.6     | 278.61 | Granulated slag (slag sand) from the manufacture of iron or steel                                                                                                                                                                                      |
| 2.3.1.6     | 278.62 | Slag, dross (other than granulated slag), scalings and other waste from the manufacture of iron or steel                                                                                                                                               |
| 2.3.1.6     | 278.69 | Other slag and ash, including seaweed ash (kelp); ash and residues from the incineration of municipal waste                                                                                                                                            |
| 2.3.1.6     | 278.93 | Steatite, natural, whether or not roughly trimmed or merely cut, by sawing or otherwise, into blocks or slabs of a rectangular (including square) shape; talc                                                                                          |
| 2.3.1.6     | 278.95 | Siliceous fossil meals (e.g., kieselguhr, tripolite and diatomite) and similar siliceous earths, whether or not calcined, of an apparent specific gravity of 1 or less                                                                                 |
| 2.3.1.6     | 278.98 | Vermiculite, perlite and chlorites, unexpanded                                                                                                                                                                                                         |
| 2.3.1.6     | 667.1  | Pearls (natural or cultured), whether or not worked or graded but not strung, mounted or set; ungraded pearls (natural or cultured), temporarily strung for convenience of transport                                                                   |
| 2.3.1.6     | 667.2  | Diamonds (other than sorted industrial diamonds), whether or not worked, but not mounted or set                                                                                                                                                        |
| 2.3.1.6     | 667.3  | Precious stones (other than diamonds) and semiprecious stones, whether or not worked or graded but not strung, mounted or set; ungraded precious stones (other than diamonds) and semiprecious stones, temporarily strung for convenience of transport |

Table S2. *Cont.*

| EW-MFA Code | SITC   | Name                                                                                                                                                                                                                                                                                                                                                                                                                                                 |
|-------------|--------|------------------------------------------------------------------------------------------------------------------------------------------------------------------------------------------------------------------------------------------------------------------------------------------------------------------------------------------------------------------------------------------------------------------------------------------------------|
| 2.3.1.6     | 667.4  | Synthetic or reconstructed precious or semiprecious stones, whether or not worked or graded but not strung, mounted or set; ungraded synthetic or reconstructed precious or semiprecious stones, temporarily strung for convenience of transport                                                                                                                                                                                                     |
| 2.3.2.1     | 273.2  | Gypsum, plasters, limestone flux, limestone and other calcareous stone of a kind used for the manufacture of lime or cement                                                                                                                                                                                                                                                                                                                          |
| 2.3.2.2     | 273.3  | Natural sands of all kinds, whether or not coloured (other than metal-bearing sands of division 28).                                                                                                                                                                                                                                                                                                                                                 |
| 2.3.2.2     | 273.4  | Pebbles, grave l, broken or crushed stone, of a kind commonly used for concrete aggregates, for road metalling or for railway or other ballast, shingle and flint, whether or not heat-treated; macadam of slag, dross or similar industrial waste, whether or not incorporating materials cited in the first part of the heading; tarred macadam; granules, chippings and powder, of stones of heading 273.12 or 273.13, whether or not heattreated |
| 2.3.2.3     | 278.26 | Kaolin and other kaolinic clays, whether or not calcined                                                                                                                                                                                                                                                                                                                                                                                             |
| 2.3.2.3     | 278.27 | Bentonite, whether or not calcined                                                                                                                                                                                                                                                                                                                                                                                                                   |
| 2.3.2.3     | 278.29 | Other clays (not including expanded clays of subgroup 663.5); andalusite, kyanite and sillimanite, whether or not calcined; mullite; chamotte or dinas earths                                                                                                                                                                                                                                                                                        |
| 2.3.2.3     | 662    | Clay construction materials and refractory construction materials                                                                                                                                                                                                                                                                                                                                                                                    |
| 2.3.3       | 663    | Mineral manufactures, n.e.s.                                                                                                                                                                                                                                                                                                                                                                                                                         |
| 2.3.3       | 664    | Glass                                                                                                                                                                                                                                                                                                                                                                                                                                                |
| 2.3.3       | 665    | Glassware                                                                                                                                                                                                                                                                                                                                                                                                                                            |
| 2.3.3       | 666    | Pottery                                                                                                                                                                                                                                                                                                                                                                                                                                              |
| 2.3.3       | 661.1  | Quicklime, slaked lime and hydraulic lime (other than calcium oxide and hydroxide of subgroup 522.6)                                                                                                                                                                                                                                                                                                                                                 |
| 2.3.3       | 661.2  | Portland cement, aluminous cement, slag cement, supersulphate cement and similar hydraulic cements, whether or not coloured or in the form of clinkers.                                                                                                                                                                                                                                                                                              |
| 2.3.3       | 661.8  | Construction materials of asbestos-cement and fibre-cement and of unfired non-metallic minerals, n.e.s.                                                                                                                                                                                                                                                                                                                                              |
| 2.4.1.1     | 322.2  | Lignite, whether or not pulverized (excluding jet)                                                                                                                                                                                                                                                                                                                                                                                                   |
| 2.4.1.2     | 321    | Coal, whether or not pulverized, but not agglomerated                                                                                                                                                                                                                                                                                                                                                                                                |
| 2.4.1.2     | 322.1  | Briquettes, ovoids and similar solid fuels manufactured from coal                                                                                                                                                                                                                                                                                                                                                                                    |
| 2.4.1.3     | 278.96 | Bituminous or oil shale and tar sands                                                                                                                                                                                                                                                                                                                                                                                                                |
| 2.4.1.4     | 322.3  | Peat (including peat litter), whether or not agglomerated                                                                                                                                                                                                                                                                                                                                                                                            |
| 2.4.2.1.1   | 333    | Petroleum oils and oils obtained from bituminous minerals, crude                                                                                                                                                                                                                                                                                                                                                                                     |
| 2.4.2.1.1   | 334    | Petroleum oils and oils obtained from bituminous minerals (other than crude); preparations, n.e.s., containing by weight 70% or more of petroleum oils or of oils obtained from bituminous minerals, these oils being the basic constituents of the preparations; waste oils                                                                                                                                                                         |
| 2.4.2.1.1   | 335    | Residual petroleum products, n.e.s., and related materials                                                                                                                                                                                                                                                                                                                                                                                           |
| 2.4.2.1.2   | 343.1  | Natural gas, liquefied                                                                                                                                                                                                                                                                                                                                                                                                                               |
| 2.4.2.2     | 343.2  | Natural gas, in the gaseous state                                                                                                                                                                                                                                                                                                                                                                                                                    |
| 2.4.2.2     | 344    | Petroleum gases and other gaseous hydrocarbons, n.e.s.                                                                                                                                                                                                                                                                                                                                                                                               |

Table S2. *Cont.*

| EW-MFA Code | SITC | Name                                                                                                                                                                  |
|-------------|------|-----------------------------------------------------------------------------------------------------------------------------------------------------------------------|
| 2.4.2.2     | 345  | Coal gas, water gas, producer gas and similar gases, other than petroleum gases and other gaseous hydrocarbons                                                        |
| 2.4.2.2     | 342  | Liquefied propane and butane                                                                                                                                          |
| 2.4.3       | 232  | Synthetic rubber; reclaimed rubber; waste, parings and scrap of unhardened rubber                                                                                     |
| 2.4.3       | 266  | Synthetic fibres suitable for spinning                                                                                                                                |
| 2.4.3       | 267  | Other man-made fibres suitable for spinning; waste of man-made fibres                                                                                                 |
| 2.4.3       | 325  | Coke and semi-coke (including char) of coal, of lignite or of peat, whether or not agglomerated; retort carbon                                                        |
| 2.4.3       | 511  | Hydrocarbons, n.e.s., and their halogenated, sulphonated, nitrated or nitrosated derivatives                                                                          |
| 2.4.3       | 512  | Alcohols, phenols, phenol-alcohols, and their halogenated, sulphonated, nitrated or nitrosated derivatives                                                            |
| 2.4.3       | 513  | Carboxylic acids and their anhydrides, halides, peroxides and peroxyacids; their halogenated, sulphonated, nitrated or nitrosated derivatives                         |
| 2.4.3       | 514  | Nitrogen-function compounds                                                                                                                                           |
| 2.4.3       | 515  | Organo-inorganic compounds, heterocyclic compounds, nucleic acids and their salts, and sulphonamides                                                                  |
| 2.4.3       | 516  | Other organic chemicals                                                                                                                                               |
| 2.4.3       | 571  | Polymers of ethylene, in primary forms                                                                                                                                |
| 2.4.3       | 572  | Polymers of styrene, in primary forms                                                                                                                                 |
| 2.4.3       | 573  | Polymers of vinyl chloride or of other halogenated olefins, in primary forms                                                                                          |
| 2.4.3       | 574  | Polyacetals, other polyethers and epoxide resins, in primary forms; polycarbonates, alkyd resins, polyallyl esters and other polyesters, in primary forms             |
| 2.4.3       | 575  | Other plastics, in primary forms                                                                                                                                      |
| 2.4.3       | 579  | Waste, parings and scrap, of plastics                                                                                                                                 |
| 2.4.3       | 581  | Tubes, pipes and hoses, and fittings therefor, of plastics                                                                                                            |
| 2.4.3       | 582  | Plates, sheets, film, foil and strip, of plastics                                                                                                                     |
| 2.4.3       | 583  | Monofilament of which any cross-sectional dimension exceeds 1 mm, rods, sticks and profile shapes, whether or not surfaceworked but not otherwise worked, of plastics |
| 2.4.3       | 621  | Materials of rubber (e.g., pastes, plates, sheets, rods, thread, tubes, of rubber)                                                                                    |
| 2.4.3       | 625  | Rubber tyres, interchangeable tyre treads, tyre flaps and inner tubes for wheels of all kinds                                                                         |
| 2.4.3       | 629  | Articles of rubber, n.e.s.                                                                                                                                            |
| 2.5         | 269  | Worn clothing and other worn textile articles; rags                                                                                                                   |
| 2.5         | 522  | Inorganic chemical elements, oxides and halogen salts                                                                                                                 |
| 2.5         | 523  | Salts and peroxysalts, of inorganic acids and metals                                                                                                                  |
| 2.5         | 524  | Other inorganic chemicals; organic and inorganic compounds of precious metals                                                                                         |
| 2.5         | 531  | Synthetic organic colouring matter and colour lakes, and preparations based thereon                                                                                   |
| 2.5         | 532  | Dyeing and tanning extracts, and synthetic tanning materials                                                                                                          |
| 2.5         | 533  | Pigments, paints, varnishes and related materials                                                                                                                     |
| 2.5         | 541  | Medicinal and pharmaceutical products, other than medicaments of group 542                                                                                            |

Table S2. *Cont.*

| EW-MFA Code | SITC | Name                                                                                                                                                                                                                                                                                                                                                                                                                                                                                                                                                                                                                                                                                                                                            |
|-------------|------|-------------------------------------------------------------------------------------------------------------------------------------------------------------------------------------------------------------------------------------------------------------------------------------------------------------------------------------------------------------------------------------------------------------------------------------------------------------------------------------------------------------------------------------------------------------------------------------------------------------------------------------------------------------------------------------------------------------------------------------------------|
| 2.5         | 542  | Medicaments (including veterinary medicaments)                                                                                                                                                                                                                                                                                                                                                                                                                                                                                                                                                                                                                                                                                                  |
| 2.5         | 551  | Essential oils, perfume and flavour materials                                                                                                                                                                                                                                                                                                                                                                                                                                                                                                                                                                                                                                                                                                   |
| 2.5         | 553  | Perfumery, cosmetic or toilet preparations (excluding soaps)                                                                                                                                                                                                                                                                                                                                                                                                                                                                                                                                                                                                                                                                                    |
| 2.5         | 554  | Soap, cleansing and polishing preparations                                                                                                                                                                                                                                                                                                                                                                                                                                                                                                                                                                                                                                                                                                      |
| 2.5         | 591  | Insecticides, rodenticides, fungicides, herbicides, anti-sprouting products and plant-growth regulators, disinfectants and similar products, put up in forms or packings for retail sale or as preparations or articles (e.g., sulphur-treated bands, wicks and candles, and fly-papers)                                                                                                                                                                                                                                                                                                                                                                                                                                                        |
| 2.5         | 592  | Starches, inulin and wheat gluten; albuminoidal substances; glues                                                                                                                                                                                                                                                                                                                                                                                                                                                                                                                                                                                                                                                                               |
| 2.5         | 593  | Explosives and pyrotechnic products                                                                                                                                                                                                                                                                                                                                                                                                                                                                                                                                                                                                                                                                                                             |
| 2.5         | 597  | Prepared additives for mineral oils and the like; prepared liquids for hydraulic transmission; anti-freezing preparations and prepared de-icing fluids; lubricating preparations                                                                                                                                                                                                                                                                                                                                                                                                                                                                                                                                                                |
| 2.5         | 598  | Miscellaneous chemical products, n.e.s.                                                                                                                                                                                                                                                                                                                                                                                                                                                                                                                                                                                                                                                                                                         |
| 2.5         | 651  | Textile yarn                                                                                                                                                                                                                                                                                                                                                                                                                                                                                                                                                                                                                                                                                                                                    |
| 2.5         | 652  | Cotton fabrics, woven (not including narrow or special fabrics)                                                                                                                                                                                                                                                                                                                                                                                                                                                                                                                                                                                                                                                                                 |
| 2.5         | 653  | Fabrics, woven, of man-made textile materials (not including narrow or special fabrics)                                                                                                                                                                                                                                                                                                                                                                                                                                                                                                                                                                                                                                                         |
| 2.5         | 654  | Other textile fabrics, woven                                                                                                                                                                                                                                                                                                                                                                                                                                                                                                                                                                                                                                                                                                                    |
| 2.5         | 655  | Knitted or crocheted fabrics (including tubular knit fabrics, n.e.s., pile fabrics and openwork fabrics), n.e.s.                                                                                                                                                                                                                                                                                                                                                                                                                                                                                                                                                                                                                                |
| 2.5         | 656  | Tulles, lace, embroidery, ribbons, trimmings and other smallwares                                                                                                                                                                                                                                                                                                                                                                                                                                                                                                                                                                                                                                                                               |
| 2.5         | 657  | Special yarns, special textile fabrics and related products                                                                                                                                                                                                                                                                                                                                                                                                                                                                                                                                                                                                                                                                                     |
| 2.5         | 658  | Made-up articles, wholly or chiefly of textile materials, n.e.s.                                                                                                                                                                                                                                                                                                                                                                                                                                                                                                                                                                                                                                                                                |
| 2.5         | 659  | Floor coverings, <i>etc.</i>                                                                                                                                                                                                                                                                                                                                                                                                                                                                                                                                                                                                                                                                                                                    |
| 2.5         | 811  | Prefabricated buildings                                                                                                                                                                                                                                                                                                                                                                                                                                                                                                                                                                                                                                                                                                                         |
| 2.5         | 812  | Sanitary, plumbing and heating fixtures and fittings, n.e.s.                                                                                                                                                                                                                                                                                                                                                                                                                                                                                                                                                                                                                                                                                    |
| 2.5         | 813  | Lighting fixtures and fittings, n.e.s.                                                                                                                                                                                                                                                                                                                                                                                                                                                                                                                                                                                                                                                                                                          |
| 2.5         | 821  | Furniture and parts thereof; bedding, mattresses, mattress supports, cushions and similar stuffed furnishings                                                                                                                                                                                                                                                                                                                                                                                                                                                                                                                                                                                                                                   |
| 2.5         | 831  | Trunks, suitcases, vanity cases, executive cases, briefcases, school satchels, spectacle cases, binocular cases, camera cases, musical instrument cases, gun cases, holsters and similar containers; travelling bags, insulated food or beverages bags, toilet bags, rucksacks, handbags, shopping bags, wallets, purses, map cases, cigarette cases, tobacco pouches, tool bags, sports bags, bottle cases, jewellery boxes, powder boxes, cutlery cases and similar containers, of leather or of composition leather, of sheeting of plastics, of textile materials, of vulcanized fibre or of paperboard, or wholly or mainly covered with such materials or with paper; travel sets for personal toilet, sewing or shoe or clothes cleaning |
| 2.5         | 841  | Men's or boys' coats, capes, jackets, suits, blazers, trousers, shorts, shirts, underwear, nightwear and similar articles of textile fabrics, not knitted or crocheted (other than those of subgroup 845.2)                                                                                                                                                                                                                                                                                                                                                                                                                                                                                                                                     |

Table S2. *Cont.*

| EW-MFA Code | SITC | Name                                                                                                                                                                                                                      |
|-------------|------|---------------------------------------------------------------------------------------------------------------------------------------------------------------------------------------------------------------------------|
| 2.5         | 842  | Women's or girls' coats, capes, jackets, suits, trousers, shorts, shirts, dresses and skirts, underwear, nightwear and similar articles of textile fabrics, not knitted or crocheted (other than those of subgroup 845.2) |
| 2.5         | 843  | Men's or boys' coats, capes, jackets, suits, blazers, trousers, shorts, shirts, underwear, nightwear and similar articles of textile fabrics, knitted or crocheted (other than those of subgroup 845.2)                   |
| 2.5         | 844  | Women's or girls' coats, capes, jackets, suits, trousers, shorts, shirts, dresses and skirts, underwear, nightwear and similar articles of textile fabrics, knitted or crocheted (other than those of subgroup 845.2)     |
| 2.5         | 845  | Articles of apparel, of textile fabrics, whether or not knitted or crocheted, n.e.s.                                                                                                                                      |
| 2.5         | 846  | Clothing accessories, of textile fabrics, whether or not knitted or crocheted (other than those for babies)                                                                                                               |
| 2.5         | 848  | Articles of apparel and clothing accessories of other than textile fabrics; headgear of all materials                                                                                                                     |
| 2.5         | 851  | Footwear                                                                                                                                                                                                                  |
| 2.5         | 871  | Optical instruments and apparatus, n.e.s.                                                                                                                                                                                 |
| 2.5         | 872  | Instruments and appliances, n.e.s., for medical, surgical, dental or veterinary purposes                                                                                                                                  |
| 2.5         | 873  | Meters and counters, n.e.s.                                                                                                                                                                                               |
| 2.5         | 874  | Measuring, checking, analyzing and controlling instruments and apparatus, n.e.s.                                                                                                                                          |
| 2.5         | 881  | Photographic apparatus and equipment, n.e.s.                                                                                                                                                                              |
| 2.5         | 882  | Photographic and cinematographic supplies                                                                                                                                                                                 |
| 2.5         | 883  | Cinematographic film, exposed and developed, whether or not incorporating soundtrack or consisting only of soundtrack                                                                                                     |
| 2.5         | 884  | Optical goods, n.e.s.                                                                                                                                                                                                     |
| 2.5         | 885  | Watches and clocks                                                                                                                                                                                                        |
| 2.5         | 891  | Arms and ammunition                                                                                                                                                                                                       |
| 2.5         | 892  | Printed matter                                                                                                                                                                                                            |
| 2.5         | 893  | Articles, n.e.s., of plastics                                                                                                                                                                                             |
| 2.5         | 894  | Baby carriages, toys, games and sporting goods                                                                                                                                                                            |
| 2.5         | 895  | Office and stationery supplies, n.e.s.                                                                                                                                                                                    |
| 2.5         | 896  | Works of art, collectors' pieces and antiques                                                                                                                                                                             |
| 2.5         | 897  | Jewellery, goldsmiths' and silversmiths' wares, and other articles of precious or semiprecious materials, n.e.s.                                                                                                          |
| 2.5         | 898  | Musical instruments and parts and accessories thereof; records, tapes and other sound or similar recordings (excluding goods of groups 763 and 883)                                                                       |
| 2.5         | 899  | Miscellaneous manufactured articles, n.e.s.                                                                                                                                                                               |
| 2.6         | 599  | Residual products of the chemical or allied industries, n.e.s.; municipal waste; sewage sludge; other wastes                                                                                                              |

**Table S3.** 2000–2009 imports weight (million t).

| ID | 2000   | 2001    | 2002    | 2003    | 2004    | 2005    | 2006    | 2007    | 2008    | 2009    |
|----|--------|---------|---------|---------|---------|---------|---------|---------|---------|---------|
| 1  | 2403.8 | 2938.8  | 2458.1  | 3442.1  | 4488.6  | 4885.3  | 5232.8  | 5238.3  | 5711.8  | 7095.2  |
| 2  | 217.9  | 265.7   | 1125.8  | 1102.6  | 1904.5  | 2622.6  | 3823.4  | 5162.3  | 4365.6  | 13190.8 |
| 3  | 9502.8 | 8890.8  | 10010.1 | 13051.5 | 17200.7 | 16929.4 | 19300.9 | 21054.6 | 22930.6 | 25940.0 |
| 4  | 7788.8 | 10281.2 | 12381.8 | 16448.5 | 22846.3 | 30115.8 | 36585.9 | 45219.1 | 51416.2 | 70256.4 |
| 5  | 1794.7 | 739.5   | 2529.0  | 2332.1  | 2800.5  | 3515.0  | 3241.2  | 3471.8  | 2944.2  | 2908.0  |
| 6  | 500.5  | 411.3   | 533.8   | 753.5   | 956.9   | 967.9   | 1057.1  | 1189.9  | 1234.0  | 1472.0  |
| 7  | 268.3  | 242.1   | 263.5   | 286.7   | 309.6   | 341.0   | 354.1   | 229.7   | 218.3   | 231.4   |
| 8  | 137.2  | 130.4   | 149.8   | 157.4   | 173.7   | 173.7   | 210.8   | 210.7   | 195.4   | 162.4   |
| 9  | 215.3  | 181.4   | 198.3   | 247.0   | 216.7   | 264.0   | 243.8   | 132.2   | 481.5   | 672.1   |
| 10 | 1350.0 | 1730.1  | 1885.5  | 2213.8  | 2609.6  | 3018.6  | 3227.5  | 3533.6  | 3755.6  | 4475.1  |
| 11 | 3016.4 | 3541.4  | 4128.6  | 4705.0  | 5275.2  | 5513.7  | 5603.4  | 6148.8  | 5954.2  | 7770.7  |
| 12 | 293.4  | 444.2   | 370.3   | 438.3   | 499.6   | 794.7   | 904.8   | 871.5   | 524.0   | 526.2   |
| 13 | 165.3  | 305.8   | 266.2   | 283.2   | 297.9   | 245.6   | 243.4   | 90.5    | 87.2    | 138.2   |
| 14 | 3190.6 | 4295.2  | 4601.6  | 6274.5  | 5539.1  | 4851.4  | 3512.9  | 3336.0  | 3147.1  | 5612.1  |
| 15 | 95.1   | 84.6    | 88.1    | 103.4   | 97.1    | 163.5   | 173.3   | 99.0    | 103.6   | 143.3   |
| 16 | 143.9  | 132.3   | 227.7   | 248.0   | 351.7   | 412.2   | 465.7   | 138.3   | 172.3   | 225.0   |
| 17 | 24.2   | 53.6    | 80.9    | 128.4   | 128.7   | 184.1   | 241.4   | 89.2    | 115.4   | 225.4   |
| 18 | 40.3   | 37.9    | 40.6    | 67.6    | 47.2    | 177.5   | 200.8   | 41.1    | 39.4    | 32.9    |
| 19 | 23.1   | 27.3    | 33.6    | 71.0    | 46.2    | 79.1    | 86.0    | 36.0    | 35.0    | 29.5    |
| 20 | 10.2   | 8.9     | 7.8     | 33.2    | 21.0    | 54.3    | 60.6    | 13.5    | 13.5    | 28.3    |
| 21 | 30.5   | 28.4    | 31.3    | 36.3    | 42.5    | 68.5    | 73.0    | 46.3    | 51.5    | 45.1    |
| 22 | 3.0    | 2.3     | 1.8     | 2.8     | 5.5     | 4.9     | 5.5     | 9.4     | 11.2    | 10.3    |

**Table S4.** 2000–2009 exports weight (million t).

| ID | 2000   | 2001   | 2002    | 2003    | 2004     | 2005    | 2006    | 2007    | 2008    | 2009    |
|----|--------|--------|---------|---------|----------|---------|---------|---------|---------|---------|
| 1  | 2399.0 | 2009.5 | 2788.3  | 3684.0  | 2040.7   | 2810.5  | 2478.3  | 3067.8  | 2244.3  | 2190.5  |
| 2  | 5506.5 | 9013.5 | 8389.7  | 9395.2  | 8672.6   | 7174.7  | 6329.2  | 5321.4  | 4545.7  | 2240.1  |
| 3  | 2324.4 | 2144.1 | 2239.6  | 2517.0  | 2118.7   | 2780.6  | 2482.3  | 2696.8  | 2773.7  | 3577.4  |
| 4  | 33.6   | 33.4   | 36.5    | 59.8    | 24.4     | 23.7    | 22.0    | 29.4    | 21.0    | 19.8    |
| 5  | 4093.5 | 5613.2 | 8041.5  | 6294.8  | 6643.2   | 7179.0  | 8606.1  | 8346.1  | 8009.7  | 7190.3  |
| 6  | 386.4  | 393.6  | 80330.8 | 67515.4 | 101855.8 | 83777.4 | 68931.5 | 78933.9 | 73409.1 | 81764.9 |
| 7  | 201.1  | 197.3  | 220.3   | 264.2   | 586.4    | 748.3   | 906.0   | 459.6   | 690.9   | 585.7   |
| 8  | 136.4  | 115.5  | 67.3    | 59.4    | 277.7    | 487.4   | 597.5   | 26.1    | 15.3    | 408.5   |
| 9  | 500.8  | 540.7  | 635.0   | 692.9   | 954.0    | 1213.8  | 1513.9  | 250.0   | 863.5   | 642.8   |
| 10 | 181.8  | 189.3  | 216.8   | 291.1   | 325.3    | 435.5   | 612.8   | 798.9   | 732.5   | 703.4   |
| 11 | 1826.9 | 1725.4 | 1789.4  | 2037.0  | 2200.9   | 2260.3  | 2842.0  | 2991.1  | 2875.6  | 1714.3  |
| 12 | 901.1  | 819.0  | 1189.4  | 1347.9  | 1249.6   | 1853.9  | 2148.9  | 1888.4  | 2067.5  | 2117.0  |
| 13 | 1005.6 | 1136.3 | 1034.6  | 1132.8  | 1262.5   | 3277.3  | 4815.3  | 4284.5  | 3624.1  | 2795.1  |
| 14 | 1841.7 | 1185.5 | 1151.0  | 1484.8  | 2915.6   | 3695.7  | 6230.6  | 7913.9  | 7015.6  | 2978.3  |
| 15 | 582.1  | 625.1  | 457.6   | 839.2   | 1228.9   | 1557.7  | 1961.6  | 1989.2  | 2070.0  | 1347.1  |
| 16 | 116.6  | 113.4  | 172.2   | 213.5   | 278.0    | 574.3   | 760.3   | 336.6   | 704.6   | 503.5   |
| 17 | 106.6  | 260.0  | 279.8   | 371.3   | 517.9    | 1107.1  | 1586.3  | 848.8   | 1039.3  | 584.3   |
| 18 | 158.6  | 168.0  | 215.4   | 260.8   | 310.0    | 779.8   | 926.7   | 445.7   | 405.2   | 368.0   |

**Table S4. Cont.**

| ID | 2000  | 2001  | 2002  | 2003  | 2004  | 2005  | 2006  | 2007  | 2008  | 2009  |
|----|-------|-------|-------|-------|-------|-------|-------|-------|-------|-------|
| 19 | 56.8  | 108.7 | 117.8 | 123.8 | 142.1 | 385.1 | 437.8 | 172.4 | 267.0 | 131.3 |
| 20 | 28.4  | 295.5 | 76.1  | 368.4 | 415.6 | 541.4 | 603.9 | 59.3  | 68.0  | 307.4 |
| 21 | 351.4 | 383.3 | 466.3 | 557.2 | 649.3 | 900.6 | 975.0 | 853.8 | 833.9 | 727.3 |
| 22 | 1.0   | 0.8   | 0.6   | 0.3   | 0.3   | 0.4   | 0.4   | 0.4   | 0.9   | 1.1   |

**Table S5. 2000–2009 physical trade balance (million t).**

| ID | 2000    | 2001    | 2002     | 2003     | 2004      | 2005     | 2006     | 2007     | 2008     | 2009     |
|----|---------|---------|----------|----------|-----------|----------|----------|----------|----------|----------|
| 1  | 4.8     | 929.3   | −330.2   | −241.9   | 2447.9    | 2074.8   | 2754.6   | 2170.5   | 3467.5   | 4904.8   |
| 2  | −5288.6 | −8747.8 | −7263.9  | −8292.6  | −6768.0   | −4552.1  | −2505.9  | −159.1   | −180.1   | 10950.6  |
| 3  | 7178.5  | 6746.7  | 7770.5   | 10534.5  | 15082.0   | 14148.8  | 16818.6  | 18357.8  | 20156.9  | 22362.6  |
| 4  | 7755.2  | 10247.8 | 12345.3  | 16388.7  | 22821.9   | 30092.1  | 36564.0  | 45189.7  | 51395.2  | 70236.6  |
| 5  | −2298.8 | −4873.7 | −5512.5  | −3962.7  | −3842.7   | −3664.0  | −5364.9  | −4874.4  | −5065.5  | −4282.3  |
| 6  | 114.1   | 17.7    | −79796.9 | −66761.8 | −100898.9 | −82809.5 | −67874.4 | −77744.1 | −72175.1 | −80293.0 |
| 7  | 67.1    | 44.8    | 43.2     | 22.5     | −276.8    | −407.3   | −551.9   | −229.9   | −472.6   | −354.3   |
| 8  | 0.8     | 14.9    | 82.5     | 98.0     | −104.0    | −313.7   | −386.8   | 184.6    | 180.2    | −246.1   |
| 9  | −285.5  | −359.4  | −436.7   | −446.0   | −737.3    | −949.8   | −1270.1  | −117.8   | −381.9   | 29.3     |
| 10 | 1168.2  | 1540.9  | 1668.7   | 1922.7   | 2284.3    | 2583.1   | 2614.7   | 2734.8   | 3023.1   | 3771.8   |
| 11 | 1189.5  | 1816.0  | 2339.3   | 2668.0   | 3074.3    | 3253.3   | 2761.4   | 3157.7   | 3078.5   | 6056.4   |
| 12 | −607.6  | −374.9  | −819.1   | −909.7   | −750.0    | −1059.2  | −1244.1  | −1016.9  | −1543.5  | −1590.9  |
| 13 | −840.3  | −830.6  | −768.3   | −849.7   | −964.5    | −3031.7  | −4571.9  | −4194.1  | −3536.9  | −2656.9  |
| 14 | 1348.9  | 3109.7  | 3450.6   | 4789.8   | 2623.5    | 1155.7   | −2717.7  | −4577.9  | −3868.5  | 2633.8   |
| 15 | −486.9  | −540.5  | −369.5   | −735.8   | −1131.8   | −1394.1  | −1788.3  | −1890.3  | −1966.5  | −1203.8  |
| 16 | 27.3    | 19.0    | 55.5     | 34.4     | 73.8      | −162.1   | −294.6   | −198.3   | −532.3   | −278.5   |
| 17 | −82.4   | −206.4  | −198.9   | −242.9   | −389.2    | −923.1   | −1344.9  | −759.6   | −923.9   | −359.0   |
| 18 | −118.3  | −130.0  | −174.8   | −193.2   | −262.8    | −602.3   | −725.9   | −404.6   | −365.8   | −335.1   |
| 19 | −33.7   | −81.4   | −84.2    | −52.8    | −95.9     | −306.0   | −351.8   | −136.5   | −232.0   | −101.8   |
| 20 | −18.2   | −286.7  | −68.3    | −335.2   | −394.6    | −487.0   | −543.3   | −45.9    | −54.5    | −279.1   |
| 21 | −320.9  | −354.9  | −435.0   | −521.0   | −606.8    | −832.1   | −902.0   | −807.6   | −782.4   | −682.2   |
| 22 | 2.0     | 1.5     | 1.2      | 2.4      | 5.2       | 4.5      | 5.1      | 9.1      | 10.3     | 9.3      |

**Table S6. 2000–2009 imports value (million USD).**

| ID | 2000       | 2001       | 2002       | 2003       | 2004       | 2005       | 2006       | 2007       | 2008       | 2009       |
|----|------------|------------|------------|------------|------------|------------|------------|------------|------------|------------|
| 1  | 9,156,442  | 9,914,302  | 9,536,090  | 14,301,182 | 20,029,731 | 20,239,997 | 2,169,3416 | 22,765,670 | 27,376,198 | 24,279,013 |
| 2  | 69,027     | 87,746     | 329,828    | 349,642    | 799,741    | 1,173,160  | 1,288,431  | 1,724,031  | 2,223,204  | 6,426,918  |
| 3  | 20,470,507 | 16,930,571 | 18,332,813 | 27,212,528 | 41,654,969 | 52,690,487 | 69,062,595 | 72,019,310 | 98,413,256 | 66,400,774 |
| 4  | 4,487,334  | 5,193,958  | 5,415,296  | 8,989,482  | 18,825,039 | 26,651,484 | 31,663,492 | 44,706,955 | 56,887,445 | 46,283,502 |
| 5  | 3,357,784  | 1,370,027  | 4,294,372  | 4,331,182  | 5,451,944  | 6,546,281  | 6,106,607  | 6,692,259  | 8,051,900  | 4,672,846  |
| 6  | 2,675,802  | 2,261,291  | 3,175,577  | 4,540,276  | 5,901,109  | 5,328,766  | 5,679,370  | 7,848,781  | 9,408,977  | 7,905,209  |
| 7  | 12,832,271 | 12,318,274 | 12,720,534 | 13,495,768 | 13,587,736 | 13,111,458 | 12,970,828 | 11,702,907 | 9,699,032  | 8,803,529  |

Table S6. *Cont.*

| ID | 2000       | 2001       | 2002       | 2003       | 2004       | 2005        | 2006        | 2007        | 2008        | 2009        |
|----|------------|------------|------------|------------|------------|-------------|-------------|-------------|-------------|-------------|
| 8  | 4,228,240  | 4,209,730  | 4,443,130  | 4,828,213  | 5,249,115  | 5,224,431   | 5,686,778   | 5,658,458   | 4,964,415   | 3,839,491   |
| 9  | 3,903,340  | 3,645,336  | 4,338,115  | 4,924,354  | 5,235,018  | 5,374,293   | 5,747,870   | 6,368,170   | 5,489,430   | 5,015,247   |
| 10 | 6,961,638  | 6,620,836  | 7,182,118  | 8,191,481  | 9,149,920  | 9,305,633   | 9,430,279   | 10,213,552  | 10,387,578  | 9,171,429   |
| 11 | 24,399,269 | 25,337,249 | 29,529,572 | 37,435,237 | 48,584,179 | 54,409,303  | 56,835,981  | 62,060,388  | 55,610,608  | 53,149,193  |
| 12 | 6,812,095  | 7,234,866  | 9,223,515  | 11,310,307 | 11,934,717 | 13,394,967  | 15,471,113  | 16,678,385  | 18,236,004  | 16,461,595  |
| 13 | 1,495,377  | 1,575,107  | 1,778,095  | 2,107,145  | 2,426,372  | 2,398,895   | 2,650,315   | 2,647,472   | 2,459,275   | 2,151,302   |
| 14 | 17,888,302 | 18,853,606 | 22,474,112 | 33,037,584 | 37,209,919 | 41,021,317  | 38,950,193  | 44,729,069  | 38,422,036  | 42,866,144  |
| 15 | 7,405,244  | 7,443,039  | 8,925,012  | 11,403,741 | 14,139,977 | 15,258,826  | 16,387,121  | 17,355,846  | 17,921,672  | 16,795,399  |
| 16 | 21,444,682 | 25,402,988 | 31,810,186 | 41,660,528 | 51,430,430 | 47,455,792  | 50,267,497  | 50,496,112  | 49,027,886  | 41,449,812  |
| 17 | 6,349,068  | 9,785,868  | 11,185,382 | 16,585,417 | 17,227,229 | 16,723,283  | 23,507,035  | 24,562,066  | 23,584,436  | 25,212,544  |
| 18 | 35,756,736 | 39,258,894 | 54,086,291 | 75,942,435 | 98,514,536 | 116,608,478 | 138,766,206 | 147,300,738 | 129,347,110 | 117,640,787 |
| 19 | 23,271,242 | 25,426,847 | 30,432,304 | 41,515,499 | 48,173,139 | 55,102,793  | 60,442,459  | 57,088,269  | 49,891,052  | 45,432,245  |
| 20 | 7,699,725  | 9,558,670  | 13,435,258 | 24,203,115 | 36,098,352 | 42,192,314  | 46,652,882  | 50,377,953  | 47,735,826  | 40,418,082  |
| 21 | 2,639,347  | 2,717,632  | 3,284,679  | 4,194,778  | 5,264,508  | 6,127,711   | 6,599,387   | 7,497,951   | 6,711,051   | 6,113,865   |
| 22 | 6718       | 4634       | 4381       | 5249       | 8596       | 7603        | 8181        | 14,711      | 16,500      | 14,290      |

**Table S7.** 2000–2009 exports value (million USD).

| ID | 2000       | 2001       | 2002       | 2003        | 2004        | 2005        | 2006        | 2007        | 2008        | 2009        |
|----|------------|------------|------------|-------------|-------------|-------------|-------------|-------------|-------------|-------------|
| 1  | 13,357,695 | 13,056,341 | 14,638,158 | 17,073,750  | 16,909,372  | 19,164,688  | 20,227,179  | 21,211,496  | 18,804,015  | 17,867,391  |
| 2  | 1,461,213  | 2,613,957  | 2,470,680  | 2,617,796   | 3,391,756   | 3,623,771   | 2,920,553   | 2,320,075   | 3,122,957   | 1,400,099   |
| 3  | 4,887,485  | 4,069,229  | 4,209,056  | 5,693,260   | 5,411,173   | 8,683,005   | 8,999,659   | 9,605,442   | 11,707,349  | 9,851,206   |
| 4  | 385,983    | 555,527    | 771,908    | 950,337     | 1,421,218   | 2,044,311   | 2,333,495   | 2,445,919   | 2,178,964   | 1,290,421   |
| 5  | 3,009,601  | 3,385,935  | 3,819,688  | 4,959,557   | 6,215,098   | 6,973,187   | 8,000,050   | 9,833,093   | 1,049,0300  | 8,047,137   |
| 6  | 28,799     | 31,147     | 5,082,003  | 3,669,676   | 5,831,349   | 4,438,595   | 4,718,520   | 5,073,089   | 5,420,938   | 5,525,997   |
| 7  | 16,134,643 | 16,484,127 | 20,027,861 | 25,534,804  | 29,678,671  | 34,718,385  | 38,602,631  | 39,396,248  | 38,922,410  | 35,240,535  |
| 8  | 46,778,777 | 47,098,425 | 52,461,280 | 63,389,379  | 70,483,110  | 80,986,133  | 95,278,552  | 100,725,053 | 90,280,323  | 80,388,698  |
| 9  | 6,691,905  | 7,225,245  | 9,271,770  | 11,877,126  | 15,667,713  | 19,449,649  | 23,380,795  | 25,847,054  | 24,526,242  | 22,242,445  |
| 10 | 1,852,055  | 1,940,241  | 2,277,433  | 2,875,177   | 3,371,105   | 4,324,347   | 5,467,422   | 6,485,292   | 6,187,260   | 5,902,577   |
| 11 | 6,676,581  | 7,006,010  | 8,344,155  | 11,095,238  | 16,077,694  | 19,841,415  | 24,316,690  | 29,071,954  | 32,424,806  | 23,536,957  |
| 12 | 7,365,274  | 7,953,126  | 8,893,935  | 10,561,650  | 12,852,157  | 16,104,804  | 17,493,071  | 20,093,165  | 22,685,667  | 17,998,387  |
| 13 | 3,095,750  | 2,879,155  | 3,554,979  | 4,244,638   | 5,260,653   | 6,717,234   | 7,971,790   | 8,115,469   | 8,203,628   | 7,281,479   |
| 14 | 7,956,065  | 6,470,762  | 6,988,999  | 9,726,647   | 20,564,018  | 25,579,293  | 40,062,519  | 49,762,866  | 54,435,117  | 21,055,435  |
| 15 | 11,389,528 | 12,067,381 | 14,791,013 | 17,952,315  | 23,193,276  | 28,900,222  | 35,556,561  | 41,572,822  | 43,703,323  | 35,352,476  |
| 16 | 8,516,282  | 10,041,891 | 12,633,369 | 17,572,598  | 23,804,692  | 30,180,150  | 38,278,189  | 47,738,922  | 54,115,033  | 42,354,610  |
| 17 | 8,918,131  | 8,852,916  | 9,876,541  | 14,291,361  | 18,114,176  | 23,396,991  | 29,761,090  | 37,881,220  | 41,179,568  | 34,759,611  |
| 18 | 26,197,243 | 27,041,923 | 34,028,338 | 43,843,286  | 56,994,996  | 68,704,079  | 86,173,889  | 96,657,302  | 97,716,448  | 84,686,192  |
| 19 | 38,146,167 | 46,371,616 | 66,471,829 | 10,208,0237 | 138,146,068 | 173,845,888 | 204,674,844 | 219,487,924 | 201,729,974 | 180,327,466 |
| 20 | 21,840,812 | 20,812,843 | 24,814,094 | 30,366,322  | 36,592,070  | 45,026,613  | 49,881,212  | 57,220,997  | 57,907,749  | 49,355,003  |
| 21 | 10,984,058 | 10,923,531 | 12,555,741 | 14,603,240  | 17,526,922  | 20,404,752  | 22,526,275  | 25,891,138  | 25,255,981  | 22,429,828  |
| 22 | 10,117     | 7545       | 5359       | 3865        | 4045        | 3499        | 3153        | 3202        | 4292        | 4430        |

**Table S8.** 2000–2009 opposite trade balance (million USD).

| ID | 2000        | 2001        | 2002        | 2003        | 2004        | 2005         | 2006         | 2007         | 2008         | 2009         |
|----|-------------|-------------|-------------|-------------|-------------|--------------|--------------|--------------|--------------|--------------|
| 1  | −4,201,253  | −3,142,039  | −5,102,069  | −2,772,568  | 3,120,359   | 1,075,309    | 1,466,237    | 1,554,173    | 8,572,182    | 6,411,623    |
| 2  | −1,392,185  | −2,526,211  | −2,140,851  | −2,268,154  | −2,592,015  | −2,450,611   | −1,632,123   | −596,044     | −899,753     | 5,026,819    |
| 3  | 15,583,022  | 12,861,342  | 14,123,758  | 21,519,268  | 36,243,797  | 44,007,483   | 60,062,936   | 62,413,869   | 86,705,907   | 56,549,568   |
| 4  | 4,101,351   | 4,638,431   | 4,643,389   | 8,039,146   | 17,403,821  | 24,607,173   | 29,329,998   | 42,261,036   | 54,708,481   | 44,993,080   |
| 5  | 348,183     | −2,015,908  | 474,684     | −628,375    | −763,154    | −426,906     | −1,893,443   | −3,140,834   | −2,438,400   | −3,374,290   |
| 6  | 2,647,003   | 2,230,145   | −1,906,426  | 870,600     | 69,760      | 890,171      | 960,850      | 2,775,692    | 3,988,039    | 2,379,212    |
| 7  | −3,302,372  | −4,165,852  | −7,307,327  | −12,039,036 | −16,090,934 | −21,606,927  | −25,631,804  | −27,693,341  | −29,223,377  | −26,437,007  |
| 8  | −42,550,537 | −42,888,695 | −48,018,149 | −58,561,166 | −65,233,995 | −75,761,702  | −89,591,774  | −95,066,595  | −85,315,908  | −76,549,206  |
| 9  | −2,788,565  | −3,579,910  | −4,933,655  | −6,952,772  | −10,432,695 | −14,075,357  | −17,632,924  | −19,478,883  | −19,036,812  | −17,227,197  |
| 10 | 5,109,583   | 4,680,595   | 4,904,685   | 5,316,304   | 5,778,815   | 4,981,286    | 3,962,857    | 3,728,260    | 4,200,318    | 3,268,852    |
| 11 | 17,722,688  | 18,331,239  | 21,185,416  | 26,339,999  | 32,506,485  | 34,567,888   | 32,519,291   | 32,988,434   | 23,185,801   | 29,612,236   |
| 12 | −553,179    | −718,261    | 329,580     | 748,657     | −917,440    | −2,709,837   | −2,021,957   | −3,414,779   | −4,449,664   | −1,536,792   |
| 13 | −1,600,372  | −1,304,048  | −1,776,884  | −2,137,492  | −2,834,281  | −4,318,339   | −5,321,475   | −5,467,997   | −5,744,354   | −5,130,177   |
| 14 | 9,932,237   | 12,382,844  | 15,485,113  | 23,310,938  | 16,645,901  | 15,442,024   | −1,112,326   | −5,033,797   | −16,013,082  | 21,810,709   |
| 15 | −3,984,284  | −4,624,342  | −5,866,001  | −6,548,574  | −9,053,300  | −13,641,395  | −19,169,440  | −24,216,976  | −25,781,651  | −18,557,077  |
| 16 | 12,928,400  | 15,361,097  | 19,176,817  | 24,087,930  | 27,625,738  | 17,275,642   | 11,989,308   | 2,757,190    | −5,087,147   | −904,798     |
| 17 | −2,569,063  | 932,952     | 1,308,842   | 2,294,056   | −886,947    | −6,673,708   | −6,254,055   | −13,319,154  | −17,595,133  | −9,547,067   |
| 18 | 9,559,493   | 12,216,971  | 20,057,953  | 32,099,149  | 41,519,540  | 47,904,398   | 52,592,317   | 50,643,436   | 31,630,663   | 32,954,595   |
| 19 | −14,874,925 | −20,944,769 | −36,039,525 | −60,564,738 | −89,972,929 | −118,743,095 | −144,232,385 | −162,399,656 | −151,838,922 | −134,895,222 |
| 20 | −14,141,087 | −11,254,173 | −11,378,836 | −6,163,207  | −493,719    | −2,834,299   | −3,228,330   | −6,843,044   | −10,171,923  | −8,936,920   |
| 21 | −8,344,711  | −8,205,898  | −9,271,062  | −10,408,461 | −12,262,415 | −14,277,041  | −15,926,888  | −18,393,187  | −18,544,930  | −16,315,963  |
| 22 | −3399       | −2911       | −978        | 1384        | 4551        | 4104         | 5028         | 11,509       | 12,208       | 9860         |
